# Supplementary material
Source: PubMed Central journal article supplement (PMC9061873)
Supplement: mmc1.pdf [file mmc1.pdf]

# THE LANCET

## Supplementary appendix

This appendix formed part of the original submission and has been peer reviewed. We post it as supplied by the authors.

Supplement to: Black R E, Liu L, Hartwig F P, Villavicencio F, et al. Optimising Child and Adolescent Health and Development 1. Health and development from preconception to 20 years of age and human capital. *Lancet* 2022; published online April 27. [https://doi.org/10.1016/S0140-6736\(21\)02533-2](https://doi.org/10.1016/S0140-6736(21)02533-2).

## Supplementary Information – Web Appendix

### Health and Development from Preconception to 20 Years of Age and Human Capital

#### Table of Contents

|                                                                                                                                             |    |
|---------------------------------------------------------------------------------------------------------------------------------------------|----|
| Appendix Table A1. Examples of nurturing care policies and practices that support human capital from preconception through adolescence----- | 3  |
| Appendix Table A2. Global and regional all-cause number of deaths from 28 weeks of gestation to 20 years, by age group in 2019 (1000s)----- | 4  |
| Appendix Figure A1. Global age-specific mortality rate per 1,000 population from 28 weeks of gestation to 20 years, 2000-2019-----          | 5  |
| Appendix Table A3. Global age-specific mortality rate per 1,000 population from 28 weeks of gestation to 20 years, 2000-2019-----           | 6  |
| Appendix Table A5. Regional Country Classifications-----                                                                                    | 8  |
| Appendix Figure A2. Map of child mortality hot spots in Africa-----                                                                         | 14 |
| Appendix Figure A3. Global cause-specific mortality fractions by age and sex in 2019-----                                                   | 15 |
| Appendix Figure A4. Regional cause-specific mortality fractions in stillbirths in 2019-----                                                 | 16 |
| Appendix Figure A5. Regional cause-specific mortality fractions in neonates 2019-----                                                       | 17 |
| Appendix Figure A6. Regional cause-specific mortality fractions in 1-59 months, 2019-----                                                   | 18 |
| Appendix Figure A7. Regional cause-specific mortality fractions in 5-9 years-old, 2019-----                                                 | 19 |
| Appendix Figure A8. Regional cause-specific mortality fractions in 10-14 years-old, 2019-----                                               | 20 |
| Appendix Figure A9. Regional cause-specific mortality fractions in females 15-19, 2019-----                                                 | 21 |
| Appendix Figure A10. Regional cause-specific mortality fractions in males 15-19, 2019-----                                                  | 22 |
| Appendix Figure A11. Age-specific mortality fractions in fragile states, 2019-----                                                          | 23 |
| Appendix Figure A12. Low Birth Weight (LBW) newborns and rates by world regions in 2015-----                                                | 24 |
| Appendix Methods A1. Methods for analysis of national surveys for length/height and Body Mass Index in children under 5y-----               | 25 |
| Appendix Figure A13. Mean HAZ by age and sex, West & Central Africa-----                                                                    | 26 |
| Appendix Figure A14. Mean HAZ by age and sex, Eastern & Southern Africa-----                                                                | 26 |
| Appendix Figure A15. Mean HAZ by age and sex, Middle East & North Africa-----                                                               | 27 |
| Appendix Figure A16. Mean HAZ by age and sex, Eastern Europe & Central Asia-----                                                            | 27 |
| Appendix Figure A17. Mean HAZ by age and sex, South Asia-----                                                                               | 28 |
| Appendix Figure A18. Mean HAZ by age and sex, East Asia & the Pacific-----                                                                  | 28 |
| Appendix Figure A19. Mean HAZ by age and sex, Latin America & Caribbean-----                                                                | 29 |
| Appendix Figure A20. Mean BAZ by age and sex, West & Central Africa-----                                                                    | 30 |
| Appendix Figure A21. Mean BAZ by age and sex, Eastern & Southern Africa-----                                                                | 30 |
| Appendix Figure A22. Mean BAZ by age and sex, Middle East & North Africa-----                                                               | 31 |

|                                                                                                                                                                                                                                                                                      |           |
|--------------------------------------------------------------------------------------------------------------------------------------------------------------------------------------------------------------------------------------------------------------------------------------|-----------|
| <b>Appendix Figure A23. Mean BAZ by age and sex, Eastern Europe &amp; Central Asia</b> -----                                                                                                                                                                                         | <b>31</b> |
| <b>Appendix Figure A24. Mean BAZ by age and sex, South Asia</b> -----                                                                                                                                                                                                                | <b>32</b> |
| <b>Appendix Figure A25. Mean BAZ by age and sex, East Asia &amp; the Pacific</b> -----                                                                                                                                                                                               | <b>32</b> |
| <b>Appendix Figure A26. Mean BAZ by age and sex, Latin America &amp; Caribbean</b> -----                                                                                                                                                                                             | <b>33</b> |
| <b>Appendix Figure A27. World map of height for 19-year-old girls by world region</b> -----                                                                                                                                                                                          | <b>34</b> |
| <b>Appendix Figure A28. World map of height for 19-year-old boys by world region</b> -----                                                                                                                                                                                           | <b>35</b> |
| <b>Appendix Figure A29. World map of Body Mass Index (BMI) for 19-year-old girls by world region</b> -----                                                                                                                                                                           | <b>36</b> |
| <b>Appendix Figure A30. World map of Body Mass Index (BMI) for 19-year-old boys by world region</b> -----                                                                                                                                                                            | <b>37</b> |
| <b>Appendix Methods A2. Analysis of data from six LMIC cohorts on life-course relationships from birth to adulthood</b> -----                                                                                                                                                        | <b>38</b> |
| <b>Appendix Table A6. Main results of the tracking analyses. See next pages for the forest plots</b> -----                                                                                                                                                                           | <b>42</b> |
| <b>Appendix Figure A31. Forest plots of the height tracking analyses. The estimates can be interpreted as changes in adult height (in cm) per Z score increment length/height at 2 (2y) and 4 (4y) years of age</b> -----                                                            | <b>43</b> |
| <b>Appendix Figure A32. Forest plots of the overweight/obesity tracking analyses. The estimates can be interpreted as prevalence ratios of overweight/obesity in adulthood per Z score increment in weight or body mass index (BMI) at 2 (2y) and 4 (4y) years of age</b> -----      | <b>44</b> |
| <b>Appendix Figure A33. Forest plot of the intelligence tracking analyses. The estimates can be interpreted as changes in adult IQ (in standardized units so that mean=100 and standard deviation=15) per Z score increment in cognitive development at 4-8.5 years of age</b> ----- | <b>45</b> |
| <b>Appendix Panel A1. The Young Lives Study</b> -----                                                                                                                                                                                                                                | <b>46</b> |
| <b>Appendix Panel A2. The Dunedin Multidisciplinary Health and Development Study</b> -----                                                                                                                                                                                           | <b>47</b> |
| <b>References</b> -----                                                                                                                                                                                                                                                              | <b>49</b> |

**Appendix Table A1. Examples of nurturing care policies and practices that support human capital from pre-conception through adolescence**

|                                    | <b>HEALTH</b>                                                   | <b>NUTRITION</b>                                                             | <b>SECURITY/ SAFETY</b>                         | <b>LEARNING</b>                                              | <b>RESPONSIVE RELATIONSHIPS</b>          |
|------------------------------------|-----------------------------------------------------------------|------------------------------------------------------------------------------|-------------------------------------------------|--------------------------------------------------------------|------------------------------------------|
| <b>Preconception/<br/>Prenatal</b> | Antenatal care, no smoking or drug use, prevent infections      | Healthy diet, micronutrients, food assistance                                | Prevention of gender-based violence             | Nutrition of girls and women, parental education             | Preparation for parenting                |
| <b>Neonatal</b>                    | Safe labor and delivery, management of small and sick newborn   | Immediate and exclusive breastfeeding                                        | Clean, water, air, and sanitation               | Pregnancy and birth preparation                              | Promote skin-to-skin contact with mother |
| <b>Infancy</b>                     | Immunizations, prevention, and treatment of infectious diseases | Exclusive and continued breastfeeding, complementary feeding, micronutrients | Safe home environment                           | Parent-child interaction, identify and mitigate disabilities | Parent-infant attachment support         |
| <b>Preprimary</b>                  | Well-child evaluations                                          | Complementary feeding and diverse diets, food assistance                     | Injury prevention                               | Quality learning opportunities, parental support             | Prevent harsh punishment                 |
| <b>Middle Childhood</b>            | Promote physical activity                                       | Healthy school meals, diverse diets                                          | Injury and bullying prevention                  | Quality instruction and parent engagement                    | Promote prosocial peer relations         |
| <b>Adolescence</b>                 | Access to sexual, reproductive, and mental health services      | Healthy school meals, avoid obesogenic diets                                 | Injury prevention, prevention of child marriage | Vocational and life skills training                          | Partnership and leadership opportunities |

Data Source: Black MM, et al.<sup>1</sup>

**Appendix Table A2. Global and regional all-cause number of deaths from 28 weeks of gestation to 20 years, by age group in 2019 (1000s)**

| Region                                 | Stillbirths                                               | 0-27d                                                     | 1-59m                                                     | 5-9y                                             | 10-14y                                           | 15-19y                                           | TOTAL                                       |
|----------------------------------------|-----------------------------------------------------------|-----------------------------------------------------------|-----------------------------------------------------------|--------------------------------------------------|--------------------------------------------------|--------------------------------------------------|---------------------------------------------|
| West and Central Africa (WCA)          | 466 [403-568]<br>(17.1% [14.4-20.3%])                     | 616 [536-737]<br>(22.5% [20.4-24.8%])                     | 1,220 [1,067-1,444]<br>(44.6% [41.2-47.7%])               | 194 [176-215]<br>(7.1% [6.1-8.0%])               | 111 [83-152]<br>(4.1% [3.0-5.5%])                | 127 [111-151]<br>(4.7% [3.9-5.6%])               | 2,735 [2,527-3,091]<br>(100%)               |
| Eastern and Southern Africa (ESA)      | 390 [355-450]<br>(22.9% [20.2-25.6%])                     | 444 [403-521]<br>(26.1% [24.0-28.6%])                     | 565 [509-663]<br>(33.2% [30.6-36.1%])                     | 115 [104-126]<br>(6.8% [5.9-7.4%])               | 70 [56-101]<br>(4.1% [3.2-5.8%])                 | 115 [104-130]<br>(6.8% [5.9-7.6%])               | 1,700 [1,618-1,884]<br>(100%)               |
| South Asia (SA)                        | 651 [630-796]<br>(26.9% [25.8-31.3%])                     | 882 [810-960]<br>(36.4% [33.3-37.6%])                     | 524 [475-578]<br>(21.6% [19.5-22.7%])                     | 105 [94-115]<br>(4.3% [3.8-4.7%])                | 100 [72-145]<br>(4.1% [2.9-5.7%])                | 162 [142-186]<br>(6.7% [5.7-7.5%])               | 2,425 [2,345-2,643]<br>(100%)               |
| Middle East and North Africa (MENA)    | 104 [92-124]<br>(26.5% [22.9-30.5%])                      | 123 [107-147]<br>(31.3% [28.3-34.4%])                     | 95 [80-118]<br>(24.2% [21.0-27.4%])                       | 21 [18-23]<br>(5.3% [4.4-5.9%])                  | 18 [14-24]<br>(4.5% [3.6-6.1%])                  | 32 [30-35]<br>(8.2% [7.1-9.1%])                  | 393 [365-445]<br>(100%)                     |
| Latin America and Caribbean (LAC)      | 83 [78-92]<br>(24.8% [23.1-26.7%])                        | 94 [88-104]<br>(28.1% [26.2-30.1%])                       | 75 [68-84]<br>(22.4% [20.5-24.2%])                        | 13 [13-14]<br>(3.9% [3.7-4.1%])                  | 16 [15-18]<br>(4.9% [4.4-5.4%])                  | 54 [52-56]<br>(16.0% [15.1-16.8%])               | 336 [325-354]<br>(100%)                     |
| East Asia and the Pacific (EAP)        | 210 [193-233]<br>(26.4% [24.1-28.7%])                     | 216 [196-244]<br>(27.1% [24.9-29.4%])                     | 214 [193-241]<br>(26.9% [24.6-29.1%])                     | 46 [40-52]<br>(5.7% [4.9-6.4%])                  | 40 [30-57]<br>(5.0% [3.7-7.0%])                  | 71 [61-84]<br>(8.9% [7.6-10.4%])                 | 795 [759-856]<br>(100%)                     |
| Eastern Europe and Central Asia (EECA) | 30 [28-33]<br>(24.2% [22.2-26.1%])                        | 36 [32-41]<br>(28.8% [25.9-31.4%])                        | 33 [30-40]<br>(26.7% [24.2-30.4%])                        | 6 [6-6]<br>(5.0% [4.6-5.1%])                     | 7 [6-7]<br>(5.2% [4.8-5.5%])                     | 13 [12-13]<br>(10.1% [9.4-10.6%])                | 125 [121-134]<br>(100%)                     |
| High Income Countries (HIC)            | 31 [29-32]<br>(26.6% [25.4-27.8%])                        | 30 [29-31]<br>(25.9% [25.0-26.9%])                        | 22 [21-23]<br>(19.1% [18.2-20.0%])                        | 5 [5-5]<br>(4.6% [4.5-4.7%])                     | 7 [6-7]<br>(5.8% [5.4-6.2%])                     | 21 [20-21]<br>(18.0% [17.3-18.7%])               | 115 [112-118]<br>(100%)                     |
| <b>GLOBAL</b>                          | <b>1,966 [1,919-2,189]</b><br><b>(22.8% [21.8-24.7%])</b> | <b>2,441 [2,321-2,650]</b><br><b>(28.3% [26.7-29.6%])</b> | <b>2,748 [2,577-3,029]</b><br><b>(31.9% [30.0-33.4%])</b> | <b>506 [480-532]</b><br><b>(5.9% [5.4-6.1%])</b> | <b>368 [335-449]</b><br><b>(4.3% [3.8-5.1%])</b> | <b>595 [568-637]</b><br><b>(6.9% [6.4-7.3%])</b> | <b>8,624 [8,474-9,186]</b><br><b>(100%)</b> |
| World Bank Fragile States              | 592 [528-700]<br>(18.3% [15.8-21.1%])                     | 772 [687-915]<br>(23.8% [21.6-26.3%])                     | 1,366 [1,211-1,607]<br>(42.1% [38.9-45.2%])               | 213 [194-233]<br>(6.6% [5.7-7.2%])               | 128 [102-173]<br>(4.0% [3.1-5.2%])               | 170 [153-196]<br>(5.2% [4.5-6.0%])               | 3,241 [3,035-3,638]<br>(100%)               |

Data source: UN IGME<sup>2,3</sup>, Masquelier et al<sup>4</sup>, Figure 2 in main text. Number of deaths expressed in thousands. Values within square brackets refer to the 90% credible intervals of the corresponding point estimates. List of the World Bank Fragile and Conflict-affected Situations available at <http://pubdocs.worldbank.org/en/888211594267968803/FCSList-FY21.pdf>, and in Table A5.

**Appendix Figure A1. Global age-specific mortality rate per 1,000 population from 28 weeks of gestation to 20 years, 2000-2019**

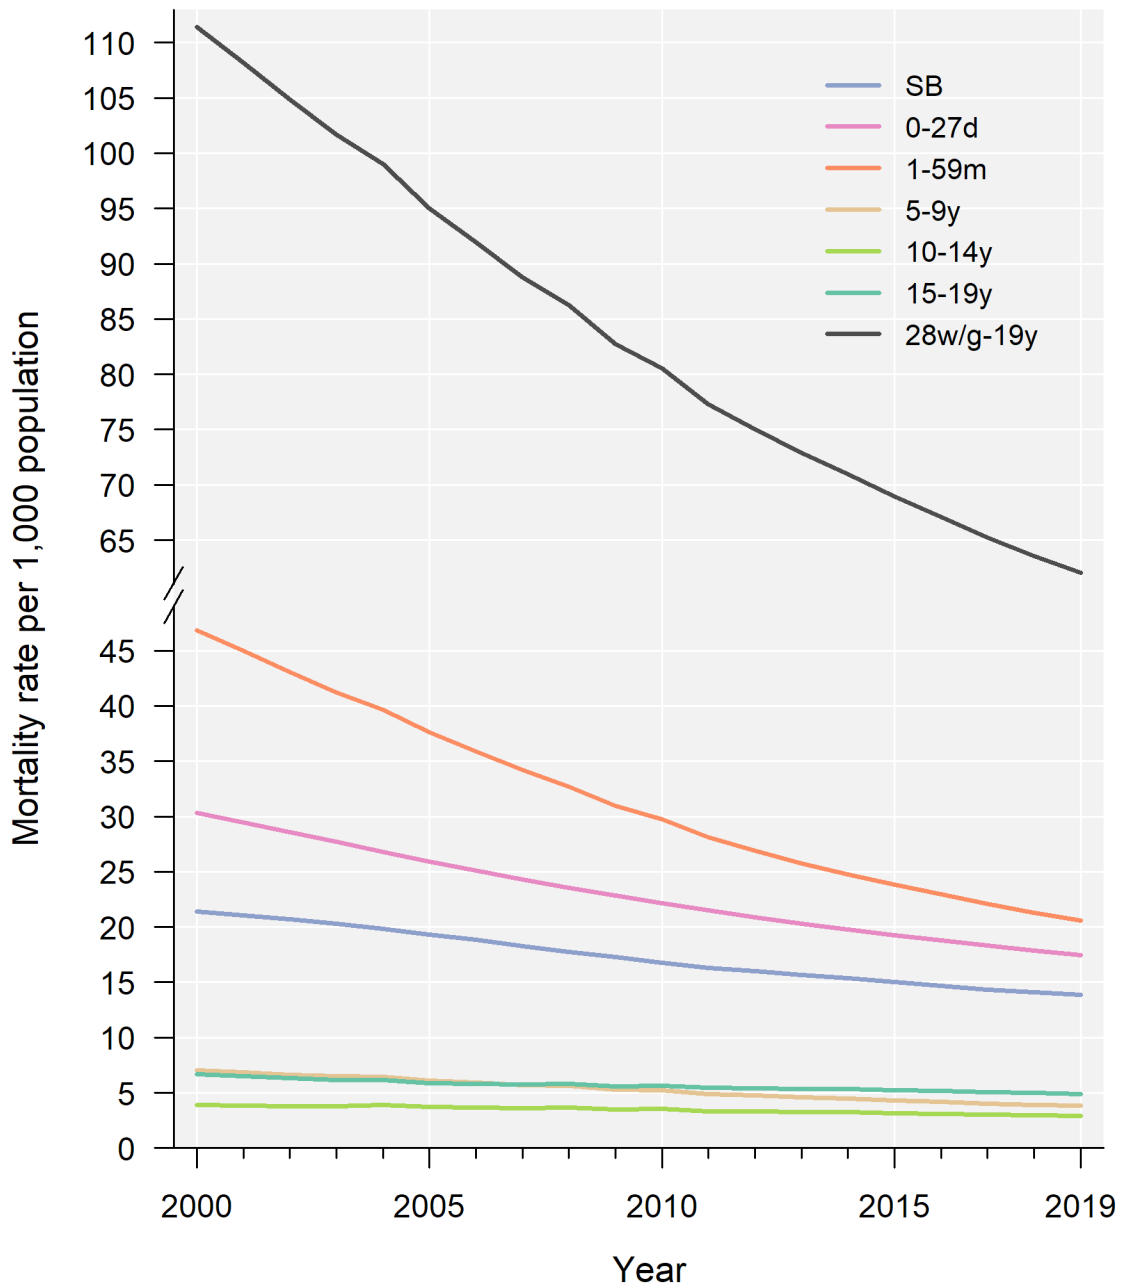

Data source: UN IGME<sup>2,3</sup>, Masquelier et al<sup>4</sup>. Mortality rates expressed in the unit of deaths per 1,000 population at the beginning of each age group and who are subject to risk of dying in that group. The dark-grey line refers to the risk of death between 28 weeks of gestation and 19 years completed (i.e., 20<sup>th</sup> birthday). Data for this figure available in Table A3.

**Appendix Table A3. Global age-specific mortality rate per 1,000 population from 28 weeks of gestation to 20 years, 2000-2019**

| Year | SB                   | 0-27d                | 1-59m                | 5-9y              | 10-14y            | 15-19y            | 28w/g-19y               |
|------|----------------------|----------------------|----------------------|-------------------|-------------------|-------------------|-------------------------|
| 2000 | 21.39 [20.00, 23.73] | 30.35 [29.62, 31.17] | 46.84 [45.03, 46.93] | 7.04 [6.91, 7.22] | 3.92 [3.68, 4.26] | 6.71 [6.58, 6.91] | 111.43 [108.96, 112.95] |
| 2001 | 21.03 [19.72, 23.22] | 29.48 [28.78, 30.28] | 45.00 [43.29, 45.12] | 6.85 [6.72, 7.02] | 3.84 [3.61, 4.16] | 6.51 [6.39, 6.70] | 108.17 [105.85, 109.63] |
| 2002 | 20.68 [19.44, 22.71] | 28.60 [27.92, 29.38] | 43.09 [41.39, 43.11] | 6.65 [6.53, 6.82] | 3.79 [3.56, 4.09] | 6.32 [6.20, 6.49] | 104.86 [102.66, 106.30] |
| 2003 | 20.32 [19.14, 22.22] | 27.71 [27.05, 28.46] | 41.20 [39.61, 41.30] | 6.50 [6.38, 6.66] | 3.80 [3.57, 4.08] | 6.19 [6.08, 6.36] | 101.69 [99.68, 103.09]  |
| 2004 | 19.86 [18.75, 21.63] | 26.80 [26.15, 27.53] | 39.65 [38.15, 39.83] | 6.45 [6.33, 6.62] | 3.90 [3.67, 4.18] | 6.16 [6.04, 6.34] | 98.99 [97.11, 100.37]   |
| 2005 | 19.34 [18.34, 21.02] | 25.92 [25.27, 26.64] | 37.61 [36.21, 37.84] | 6.08 [5.96, 6.23] | 3.71 [3.49, 3.98] | 5.89 [5.78, 6.05] | 95.03 [93.30, 96.41]    |
| 2006 | 18.83 [17.87, 20.42] | 25.08 [24.45, 25.80] | 35.90 [34.57, 36.18] | 5.91 [5.79, 6.07] | 3.69 [3.47, 3.97] | 5.82 [5.71, 5.99] | 91.93 [90.33, 93.34]    |
| 2007 | 18.29 [17.46, 19.78] | 24.30 [23.69, 24.99] | 34.20 [32.93, 34.53] | 5.71 [5.59, 5.87] | 3.63 [3.42, 3.91] | 5.74 [5.63, 5.92] | 88.79 [87.31, 90.21]    |
| 2008 | 17.78 [17.05, 19.19] | 23.55 [22.96, 24.23] | 32.71 [31.49, 33.09] | 5.66 [5.54, 5.83] | 3.69 [3.47, 3.99] | 5.81 [5.70, 6.01] | 86.27 [84.90, 87.71]    |
| 2009 | 17.26 [16.60, 18.60] | 22.83 [22.26, 23.51] | 30.95 [29.74, 31.36] | 5.29 [5.17, 5.45] | 3.48 [3.27, 3.76] | 5.61 [5.49, 5.82] | 82.73 [81.42, 84.15]    |
| 2010 | 16.76 [16.17, 18.03] | 22.16 [21.59, 22.83] | 29.74 [28.55, 30.19] | 5.24 [5.12, 5.42] | 3.55 [3.32, 3.84] | 5.66 [5.52, 5.89] | 80.55 [79.29, 82.01]    |
| 2011 | 16.32 [15.80, 17.57] | 21.50 [20.93, 22.19] | 28.12 [26.90, 28.61] | 4.90 [4.78, 5.07] | 3.34 [3.13, 3.65] | 5.45 [5.31, 5.68] | 77.29 [76.04, 78.80]    |
| 2012 | 16.00 [15.53, 17.25] | 20.89 [20.32, 21.60] | 26.89 [25.64, 27.43] | 4.75 [4.62, 4.92] | 3.32 [3.09, 3.65] | 5.42 [5.27, 5.67] | 75.04 [73.79, 76.65]    |
| 2013 | 15.68 [15.26, 16.95] | 20.30 [19.73, 21.07] | 25.76 [24.50, 26.40] | 4.60 [4.46, 4.77] | 3.28 [3.05, 3.64] | 5.37 [5.22, 5.63] | 72.91 [71.66, 74.65]    |
| 2014 | 15.36 [14.95, 16.61] | 19.76 [19.16, 20.58] | 24.76 [23.44, 25.50] | 4.46 [4.32, 4.64] | 3.25 [3.01, 3.66] | 5.35 [5.18, 5.62] | 70.96 [69.68, 72.88]    |
| 2015 | 15.03 [14.62, 16.31] | 19.25 [18.62, 20.16] | 23.84 [22.48, 24.70] | 4.30 [4.15, 4.48] | 3.17 [2.93, 3.62] | 5.25 [5.07, 5.53] | 68.96 [67.65, 71.11]    |
| 2016 | 14.66 [14.29, 15.98] | 18.78 [18.12, 19.79] | 22.96 [21.56, 23.99] | 4.17 [4.01, 4.35] | 3.10 [2.87, 3.61] | 5.18 [4.98, 5.47] | 67.07 [65.75, 69.52]    |
| 2017 | 14.34 [14.00, 15.75] | 18.32 [17.60, 19.45] | 22.10 [20.65, 23.33] | 4.04 [3.87, 4.23] | 3.03 [2.80, 3.58] | 5.09 [4.89, 5.40] | 65.24 [63.91, 68.03]    |
| 2018 | 14.08 [13.76, 15.59] | 17.89 [17.11, 19.19] | 21.31 [19.77, 22.75] | 3.93 [3.75, 4.11] | 2.96 [2.72, 3.56] | 4.98 [4.77, 5.31] | 63.55 [62.22, 66.72]    |
| 2019 | 13.87 [13.55, 15.43] | 17.48 [16.61, 18.97] | 20.57 [18.93, 22.26] | 3.83 [3.63, 4.02] | 2.90 [2.67, 3.57] | 4.89 [4.67, 5.24] | 62.02 [60.63, 65.60]    |

Data source: UN IGME<sup>2,3</sup>, Masquelier et al<sup>4</sup>. Mortality rates, and the corresponding 90% credible intervals (within square brackets), are expressed in the unit of deaths per 1,000 population at the beginning of each age group and who are subject to risk of dying in that group. Estimates in the right-end column refer to the risk of death between 28 weeks of gestation and 19 years completed (i.e., 20<sup>th</sup> birthday).

**Appendix Table A4. Global and regional age-specific AARR, 2000-2019**

| Region                                 | SB                | 0-27d             | 1-59m             | 5-9y              | 10-14y             | 15-19y             | 28w/g-19y         |
|----------------------------------------|-------------------|-------------------|-------------------|-------------------|--------------------|--------------------|-------------------|
| West and Central Africa (WCA)          | 1.30 [0.50, 2.10] | 1.67 [0.79, 2.50] | 3.54 [2.71, 4.31] | 2.70 [2.23, 3.25] | 1.05 [-0.58, 2.70] | 1.22 [0.30, 2.07]  | 2.40 [1.87, 2.86] |
| Eastern and Southern Africa (ESA)      | 1.53 [0.92, 2.17] | 2.21 [1.50, 2.89] | 5.82 [5.09, 6.49] | 4.98 [4.53, 5.57] | 2.55 [0.79, 4.32]  | 3.12 [2.53, 3.69]  | 3.67 [3.28, 4.03] |
| South Asia (SA)                        | 2.59 [1.60, 3.66] | 3.22 [2.73, 3.74] | 6.11 [5.54, 6.67] | 5.29 [4.80, 5.87] | 3.08 [1.20, 5.07]  | 2.80 [2.10, 3.62]  | 3.76 [3.41, 4.14] |
| Middle East and North Africa (MENA)    | 2.30 [1.57, 3.04] | 2.73 [1.85, 3.55] | 4.21 [3.12, 5.22] | 2.17 [1.78, 2.68] | 0.56 [-0.84, 1.78] | 0.13 [-0.27, 0.52] | 2.61 [2.08, 3.07] |
| Latin America and Caribbean (LAC)      | 1.83 [1.32, 2.35] | 2.93 [2.40, 3.43] | 4.57 [3.99, 5.15] | 2.65 [2.40, 2.89] | 1.36 [0.80, 1.85]  | 0.38 [0.18, 0.58]  | 2.68 [2.43, 2.91] |
| East Asia and the Pacific (EAP)        | 3.79 [3.20, 4.37] | 5.36 [4.73, 5.99] | 5.43 [4.79, 6.07] | 4.51 [3.79, 5.31] | 2.59 [0.40, 4.73]  | 2.79 [1.92, 3.71]  | 4.55 [4.22, 4.89] |
| Eastern Europe and Central Asia (EECA) | 3.48 [2.96, 4.03] | 5.35 [4.71, 5.98] | 6.47 [5.66, 7.18] | 5.59 [5.45, 5.73] | 3.34 [2.86, 3.85]  | 4.04 [3.75, 4.32]  | 5.01 [4.70, 5.29] |
| High Income Countries (HIC)            | 1.24 [0.91, 1.56] | 1.69 [1.48, 1.91] | 2.53 [2.28, 2.78] | 2.79 [2.68, 2.91] | 2.33 [1.93, 2.70]  | 2.22 [2.01, 2.41]  | 1.92 [1.79, 2.05] |
| <b>GLOBAL</b>                          | 2.15 [1.67, 2.65] | 2.84 [2.47, 3.19] | 4.25 [3.80, 4.65] | 3.23 [2.97, 3.50] | 1.32 [0.46, 2.18]  | 1.63 [1.31, 1.94]  | 2.98 [2.75, 3.19] |

Data source: Own calculations using data from UN IGME<sup>2,3</sup>, Masquelier et al<sup>4</sup>. Annual average rate of mortality reduction (AARR) for the period 2000-2019 computed using global and regional age-specific mortality rates from 2000 and 2019. Values within square brackets refer to the 90% credible intervals of the corresponding point estimates.



**Appendix Table A5. Regional Country Classifications**

| Country Name                   | ISO3 | Region                      | Fragile State |
|--------------------------------|------|-----------------------------|---------------|
| Cambodia                       | KHM  | East Asia and the Pacific   | NO            |
| China                          | CHN  | East Asia and the Pacific   | NO            |
| Cook Islands                   | COK  | East Asia and the Pacific   | NO            |
| Federated States of Micronesia | FSM  | East Asia and the Pacific   | YES           |
| Fiji                           | FJI  | East Asia and the Pacific   | NO            |
| Indonesia                      | IDN  | East Asia and the Pacific   | NO            |
| Kiribati                       | KIR  | East Asia and the Pacific   | YES           |
| Korea DPR                      | PRK  | East Asia and the Pacific   | NO            |
| Lao PDR                        | LAO  | East Asia and the Pacific   | YES           |
| Malaysia                       | MYS  | East Asia and the Pacific   | NO            |
| Marshall Islands               | MHL  | East Asia and the Pacific   | YES           |
| Mongolia                       | MNG  | East Asia and the Pacific   | NO            |
| Myanmar                        | MMR  | East Asia and the Pacific   | YES           |
| Nauru                          | NRU  | East Asia and the Pacific   | NO            |
| Niue                           | NIU  | East Asia and the Pacific   | NO            |
| Palau                          | PLW  | East Asia and the Pacific   | NO            |
| Papua New Guinea               | PNG  | East Asia and the Pacific   | YES           |
| Philippines                    | PHL  | East Asia and the Pacific   | NO            |
| Samoa                          | WSM  | East Asia and the Pacific   | NO            |
| Solomon Islands                | SLB  | East Asia and the Pacific   | YES           |
| Thailand                       | THA  | East Asia and the Pacific   | NO            |
| Timor Leste                    | TLS  | East Asia and the Pacific   | YES           |
| Tonga                          | TON  | East Asia and the Pacific   | NO            |
| Tuvalu                         | TUV  | East Asia and the Pacific   | YES           |
| Vanuatu                        | VUT  | East Asia and the Pacific   | NO            |
| Vietnam                        | VNM  | East Asia and the Pacific   | NO            |
| Angola                         | AGO  | Eastern and Southern Africa | NO            |
| Botswana                       | BWA  | Eastern and Southern Africa | NO            |
| Burundi                        | BDI  | Eastern and Southern Africa | YES           |
| Comoros                        | COM  | Eastern and Southern Africa | YES           |
| Djibouti                       | DJI  | Eastern and Southern Africa | NO            |
| Eritrea                        | ERI  | Eastern and Southern Africa | YES           |
| Ethiopia                       | ETH  | Eastern and Southern Africa | NO            |
| Kenya                          | KEN  | Eastern and Southern Africa | NO            |
| Lesotho                        | LSO  | Eastern and Southern Africa | NO            |
| Madagascar                     | MDG  | Eastern and Southern Africa | NO            |

| Country Name         | ISO3 | Region                          | Fragile State |
|----------------------|------|---------------------------------|---------------|
| Malawi               | MWI  | Eastern and Southern Africa     | NO            |
| Mauritius            | MUS  | Eastern and Southern Africa     | NO            |
| Mozambique           | MOZ  | Eastern and Southern Africa     | YES           |
| Namibia              | NAM  | Eastern and Southern Africa     | NO            |
| Rwanda               | RWA  | Eastern and Southern Africa     | NO            |
| Seychelles           | SYC  | Eastern and Southern Africa     | NO            |
| Somalia              | SOM  | Eastern and Southern Africa     | YES           |
| South Africa         | ZAF  | Eastern and Southern Africa     | NO            |
| South Sudan          | SSD  | Eastern and Southern Africa     | YES           |
| Sudan                | SDN  | Eastern and Southern Africa     | YES           |
| Swaziland            | SWZ  | Eastern and Southern Africa     | NO            |
| Tanzania             | TZA  | Eastern and Southern Africa     | NO            |
| Uganda               | UGA  | Eastern and Southern Africa     | NO            |
| Zambia               | ZMB  | Eastern and Southern Africa     | NO            |
| Zimbabwe             | ZWE  | Eastern and Southern Africa     | YES           |
| Albania              | ALB  | Eastern Europe and Central Asia | NO            |
| Armenia              | ARM  | Eastern Europe and Central Asia | NO            |
| Azerbaijan           | AZE  | Eastern Europe and Central Asia | NO            |
| Belarus              | BLR  | Eastern Europe and Central Asia | NO            |
| Bosnia & Herzegovina | BIH  | Eastern Europe and Central Asia | NO            |
| Bulgaria             | BGR  | Eastern Europe and Central Asia | NO            |
| Georgia              | GEO  | Eastern Europe and Central Asia | NO            |
| Kazakhstan           | KAZ  | Eastern Europe and Central Asia | NO            |
| Kyrgyzstan           | KGZ  | Eastern Europe and Central Asia | NO            |
| Macedonia            | MKD  | Eastern Europe and Central Asia | NO            |
| Moldova              | MDA  | Eastern Europe and Central Asia | NO            |
| Montenegro           | MNE  | Eastern Europe and Central Asia | NO            |
| Romania              | ROU  | Eastern Europe and Central Asia | NO            |
| Russian Federation   | RUS  | Eastern Europe and Central Asia | NO            |
| Serbia               | SRB  | Eastern Europe and Central Asia | NO            |
| Tajikistan           | TJK  | Eastern Europe and Central Asia | NO            |
| Turkey               | TUR  | Eastern Europe and Central Asia | NO            |
| Turkmenistan         | TKM  | Eastern Europe and Central Asia | NO            |
| Ukraine              | UKR  | Eastern Europe and Central Asia | NO            |
| Uzbekistan           | UZB  | Eastern Europe and Central Asia | NO            |
| Andorra              | AND  | High Income Countries           | NO            |
| Australia            | AUS  | High Income Countries           | NO            |
| Austria              | AUT  | High Income Countries           | NO            |
| Bahamas              | BHS  | High Income Countries           | NO            |

| <b>Country Name</b>             | <b>ISO3</b> | <b>Region</b>         | <b>Fragile State</b> |
|---------------------------------|-------------|-----------------------|----------------------|
| <b>Belgium</b>                  | BEL         | High Income Countries | NO                   |
| <b>Brunei</b>                   | BRN         | High Income Countries | NO                   |
| <b>Canada</b>                   | CAN         | High Income Countries | NO                   |
| <b>Croatia</b>                  | HRV         | High Income Countries | NO                   |
| <b>Cyprus</b>                   | CYP         | High Income Countries | NO                   |
| <b>Czech Republic</b>           | CZE         | High Income Countries | NO                   |
| <b>Denmark</b>                  | DNK         | High Income Countries | NO                   |
| <b>Estonia</b>                  | EST         | High Income Countries | NO                   |
| <b>Finland</b>                  | FIN         | High Income Countries | NO                   |
| <b>France</b>                   | FRA         | High Income Countries | NO                   |
| <b>Germany</b>                  | DEU         | High Income Countries | NO                   |
| <b>Greece</b>                   | GRC         | High Income Countries | NO                   |
| <b>Hungary</b>                  | HUN         | High Income Countries | NO                   |
| <b>Iceland</b>                  | ISL         | High Income Countries | NO                   |
| <b>Ireland</b>                  | IRL         | High Income Countries | NO                   |
| <b>Israel</b>                   | ISR         | High Income Countries | NO                   |
| <b>Italy</b>                    | ITA         | High Income Countries | NO                   |
| <b>Japan</b>                    | JPN         | High Income Countries | NO                   |
| <b>Korea Rep</b>                | KOR         | High Income Countries | NO                   |
| <b>Latvia</b>                   | LVA         | High Income Countries | NO                   |
| <b>Liechtenstein</b>            | LIE         | High Income Countries | NO                   |
| <b>Lithuania</b>                | LTU         | High Income Countries | NO                   |
| <b>Luxembourg</b>               | LUX         | High Income Countries | NO                   |
| <b>Malta</b>                    | MLT         | High Income Countries | NO                   |
| <b>Monaco</b>                   | MCO         | High Income Countries | NO                   |
| <b>Netherlands</b>              | NLD         | High Income Countries | NO                   |
| <b>New Zealand</b>              | NZL         | High Income Countries | NO                   |
| <b>Norway</b>                   | NOR         | High Income Countries | NO                   |
| <b>Poland</b>                   | POL         | High Income Countries | NO                   |
| <b>Portugal</b>                 | PRT         | High Income Countries | NO                   |
| <b>San Marino</b>               | SMR         | High Income Countries | NO                   |
| <b>Singapore</b>                | SGP         | High Income Countries | NO                   |
| <b>Slovakia</b>                 | SVK         | High Income Countries | NO                   |
| <b>Slovenia</b>                 | SVN         | High Income Countries | NO                   |
| <b>Spain</b>                    | ESP         | High Income Countries | NO                   |
| <b>Sweden</b>                   | SWE         | High Income Countries | NO                   |
| <b>Switzerland</b>              | CHE         | High Income Countries | NO                   |
| <b>United Kingdom</b>           | GBR         | High Income Countries | NO                   |
| <b>United States of America</b> | USA         | High Income Countries | NO                   |

| Country Name                | ISO3 | Region                       | Fragile State |
|-----------------------------|------|------------------------------|---------------|
| Antigua & Barbuda           | ATG  | Latin America and Caribbean  | NO            |
| Argentina                   | ARG  | Latin America and Caribbean  | NO            |
| Barbados                    | BRB  | Latin America and Caribbean  | NO            |
| Belize                      | BLZ  | Latin America and Caribbean  | NO            |
| Bolivia                     | BOL  | Latin America and Caribbean  | NO            |
| Brazil                      | BRA  | Latin America and Caribbean  | NO            |
| Chile                       | CHL  | Latin America and Caribbean  | NO            |
| Colombia                    | COL  | Latin America and Caribbean  | NO            |
| Costa Rica                  | CRI  | Latin America and Caribbean  | NO            |
| Cuba                        | CUB  | Latin America and Caribbean  | NO            |
| Dominica                    | DMA  | Latin America and Caribbean  | NO            |
| Dominican Republic          | DOM  | Latin America and Caribbean  | NO            |
| Ecuador                     | ECU  | Latin America and Caribbean  | NO            |
| El Salvador                 | SLV  | Latin America and Caribbean  | NO            |
| Grenada                     | GRD  | Latin America and Caribbean  | NO            |
| Guatemala                   | GTM  | Latin America and Caribbean  | NO            |
| Guyana                      | GUY  | Latin America and Caribbean  | NO            |
| Haiti                       | HTI  | Latin America and Caribbean  | YES           |
| Honduras                    | HND  | Latin America and Caribbean  | NO            |
| Jamaica                     | JAM  | Latin America and Caribbean  | NO            |
| Mexico                      | MEX  | Latin America and Caribbean  | NO            |
| Nicaragua                   | NIC  | Latin America and Caribbean  | NO            |
| Panama                      | PAN  | Latin America and Caribbean  | NO            |
| Paraguay                    | PRY  | Latin America and Caribbean  | NO            |
| Peru                        | PER  | Latin America and Caribbean  | NO            |
| Saint Kitts & Nevis         | KNA  | Latin America and Caribbean  | NO            |
| Saint Lucia                 | LCA  | Latin America and Caribbean  | NO            |
| St Vincent & the Grenadines | VCT  | Latin America and Caribbean  | NO            |
| Suriname                    | SUR  | Latin America and Caribbean  | NO            |
| Trinidad & Tobago           | TTO  | Latin America and Caribbean  | NO            |
| Uruguay                     | URY  | Latin America and Caribbean  | NO            |
| Venezuela                   | VEN  | Latin America and Caribbean  | YES           |
| Algeria                     | DZA  | Middle East and North Africa | NO            |
| Bahrain                     | BHR  | Middle East and North Africa | NO            |
| Egypt                       | EGY  | Middle East and North Africa | NO            |
| Iran                        | IRN  | Middle East and North Africa | NO            |
| Iraq                        | IRQ  | Middle East and North Africa | YES           |
| Jordan                      | JOR  | Middle East and North Africa | NO            |
| Kuwait                      | KWT  | Middle East and North Africa | NO            |

| Country Name             | ISO3 | Region                       | Fragile State |
|--------------------------|------|------------------------------|---------------|
| Lebanon                  | LBN  | Middle East and North Africa | YES           |
| Libya                    | LBY  | Middle East and North Africa | YES           |
| Morocco                  | MAR  | Middle East and North Africa | NO            |
| Oman                     | OMN  | Middle East and North Africa | NO            |
| Qatar                    | QAT  | Middle East and North Africa | NO            |
| Saudi Arabia             | SAU  | Middle East and North Africa | NO            |
| State of Palestine       | PSE  | Middle East and North Africa | YES           |
| Syria                    | SYR  | Middle East and North Africa | YES           |
| Tunisia                  | TUN  | Middle East and North Africa | NO            |
| United Arab Emirates     | ARE  | Middle East and North Africa | NO            |
| Yemen                    | YEM  | Middle East and North Africa | YES           |
| Afghanistan              | AFG  | South Asia                   | YES           |
| Bangladesh               | BGD  | South Asia                   | NO            |
| Bhutan                   | BTN  | South Asia                   | NO            |
| India                    | IND  | South Asia                   | NO            |
| Maldives                 | MDV  | South Asia                   | NO            |
| Nepal                    | NPL  | South Asia                   | NO            |
| Pakistan                 | PAK  | South Asia                   | NO            |
| Sri Lanka                | LKA  | South Asia                   | NO            |
| Benin                    | BEN  | West and Central Africa      | NO            |
| Burkina Faso             | BFA  | West and Central Africa      | YES           |
| Cameroon                 | CMR  | West and Central Africa      | YES           |
| Cape Verde               | CPV  | West and Central Africa      | NO            |
| Central African Republic | CAF  | West and Central Africa      | YES           |
| Chad                     | TCD  | West and Central Africa      | YES           |
| Congo                    | COG  | West and Central Africa      | YES           |
| Congo DR                 | COD  | West and Central Africa      | YES           |
| Cote d'Ivoire            | CIV  | West and Central Africa      | NO            |
| Equatorial Guinea        | GNQ  | West and Central Africa      | NO            |
| Gabon                    | GAB  | West and Central Africa      | NO            |
| Gambia The               | GMB  | West and Central Africa      | YES           |
| Ghana                    | GHA  | West and Central Africa      | NO            |
| Guinea                   | GIN  | West and Central Africa      | NO            |
| Guinea-Bissau            | GNB  | West and Central Africa      | YES           |
| Liberia                  | LBR  | West and Central Africa      | YES           |
| Mali                     | MLI  | West and Central Africa      | YES           |
| Mauritania               | MRT  | West and Central Africa      | NO            |
| Niger                    | NER  | West and Central Africa      | YES           |
| Nigeria                  | NGA  | West and Central Africa      | YES           |

| <b>Country Name</b>            | <b>ISO3</b> | <b>Region</b>           | <b>Fragile State</b> |
|--------------------------------|-------------|-------------------------|----------------------|
| <b>Sao Tome &amp; Principe</b> | STP         | West and Central Africa | NO                   |
| <b>Senegal</b>                 | SEN         | West and Central Africa | NO                   |
| <b>Sierra Leone</b>            | SLE         | West and Central Africa | NO                   |
| <b>Togo</b>                    | TGO         | West and Central Africa | NO                   |

**Appendix Figure A2. Map of child mortality hot spots in Africa**

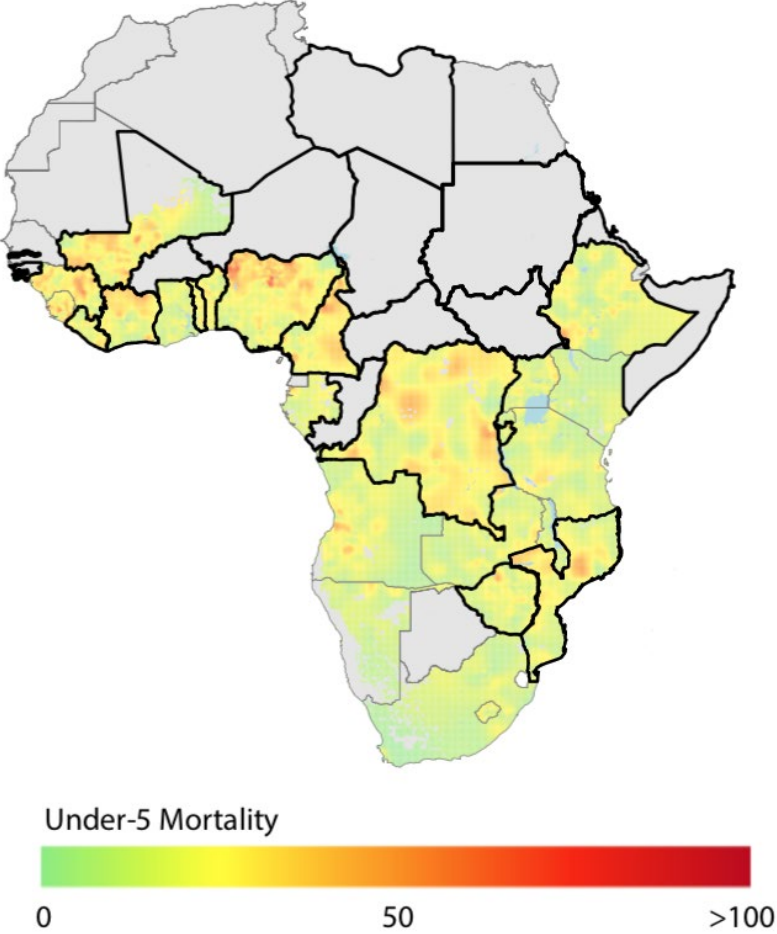

\*Bold national borders indicate fragile and conflict countries

Source: Updated analysis using methods of Burke et al.<sup>5</sup>

**Appendix Figure A3. Global cause-specific mortality fractions by age and sex in 2019**

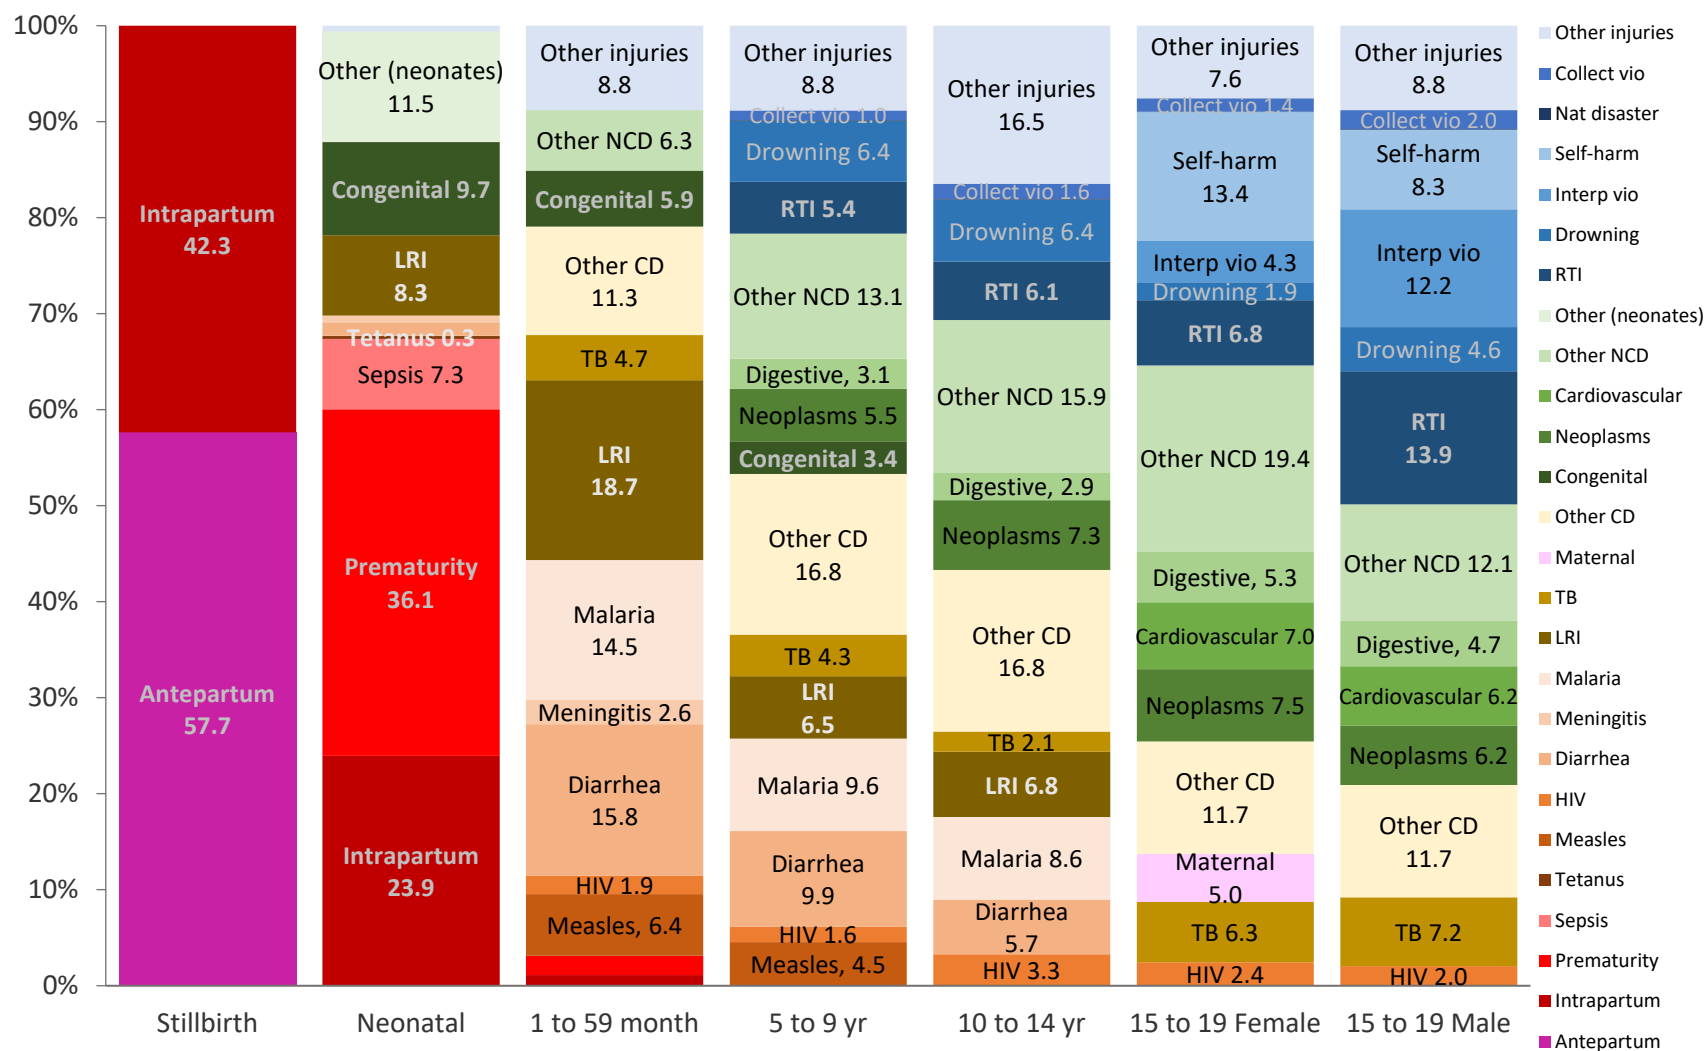

Data source: Cause-of-death distribution in stillbirths from UN IGME<sup>2</sup>, in under-fives from Mulick et al<sup>6</sup>, Perin et al<sup>7</sup> and in 5-19 years-old from Liu, Villavicencio et al.<sup>8</sup>



**Appendix Figure A4. Regional cause-specific mortality fractions in stillbirths in 2019**

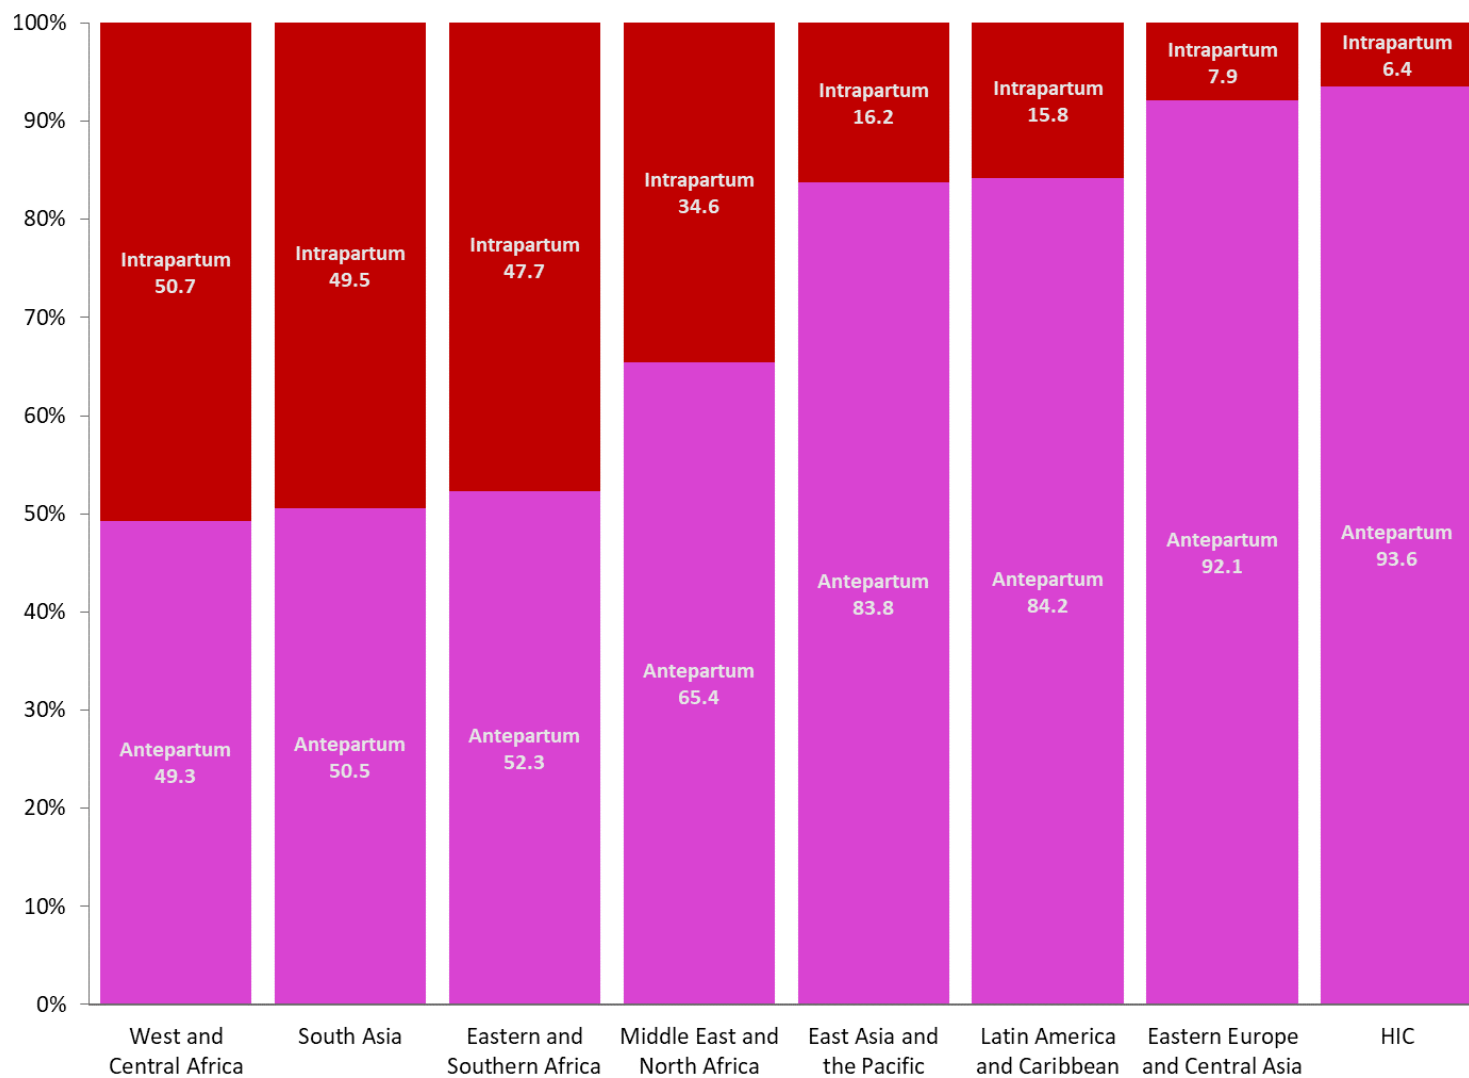

Data source: Cause-of-death distribution in stillbirths from UN IGME.<sup>2</sup>

**Appendix Figure A5. Regional cause-specific mortality fractions in neonates 2019**

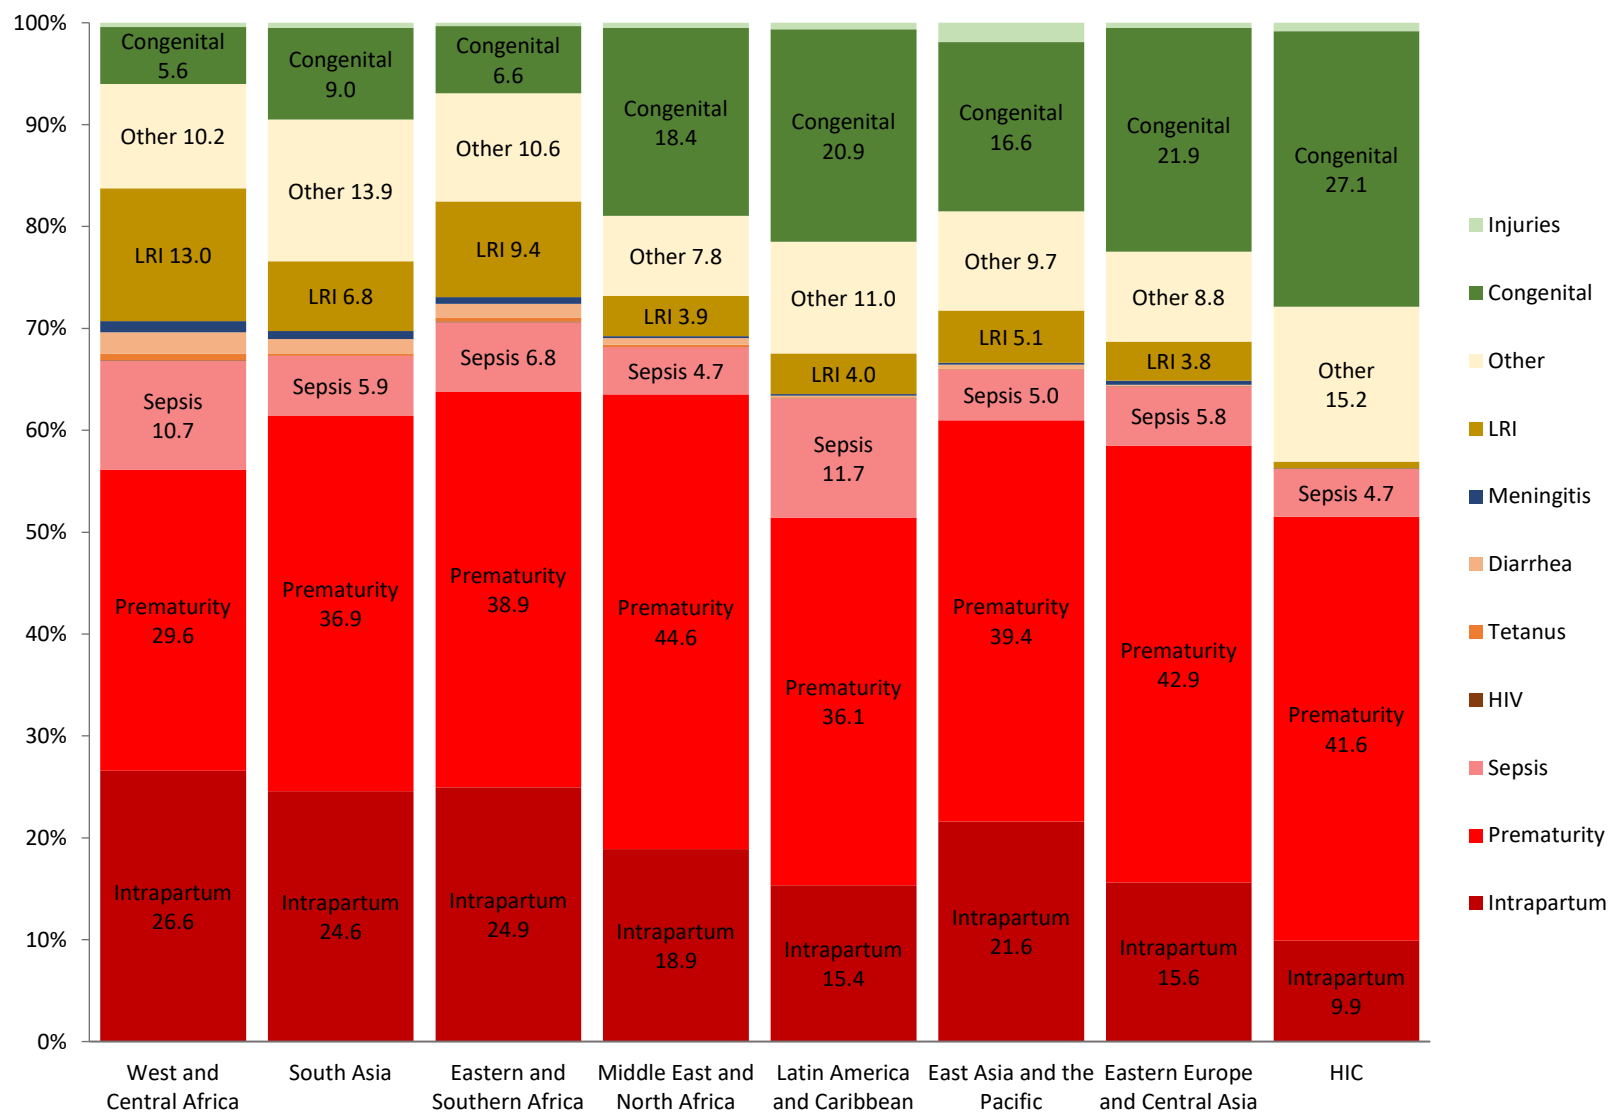

Data source: Cause-of-death distribution in neonates from Mulick et al<sup>6</sup>, Perin et al.<sup>7</sup>

**Appendix Figure A6. Regional cause-specific mortality fractions in 1-59 months, 2019**

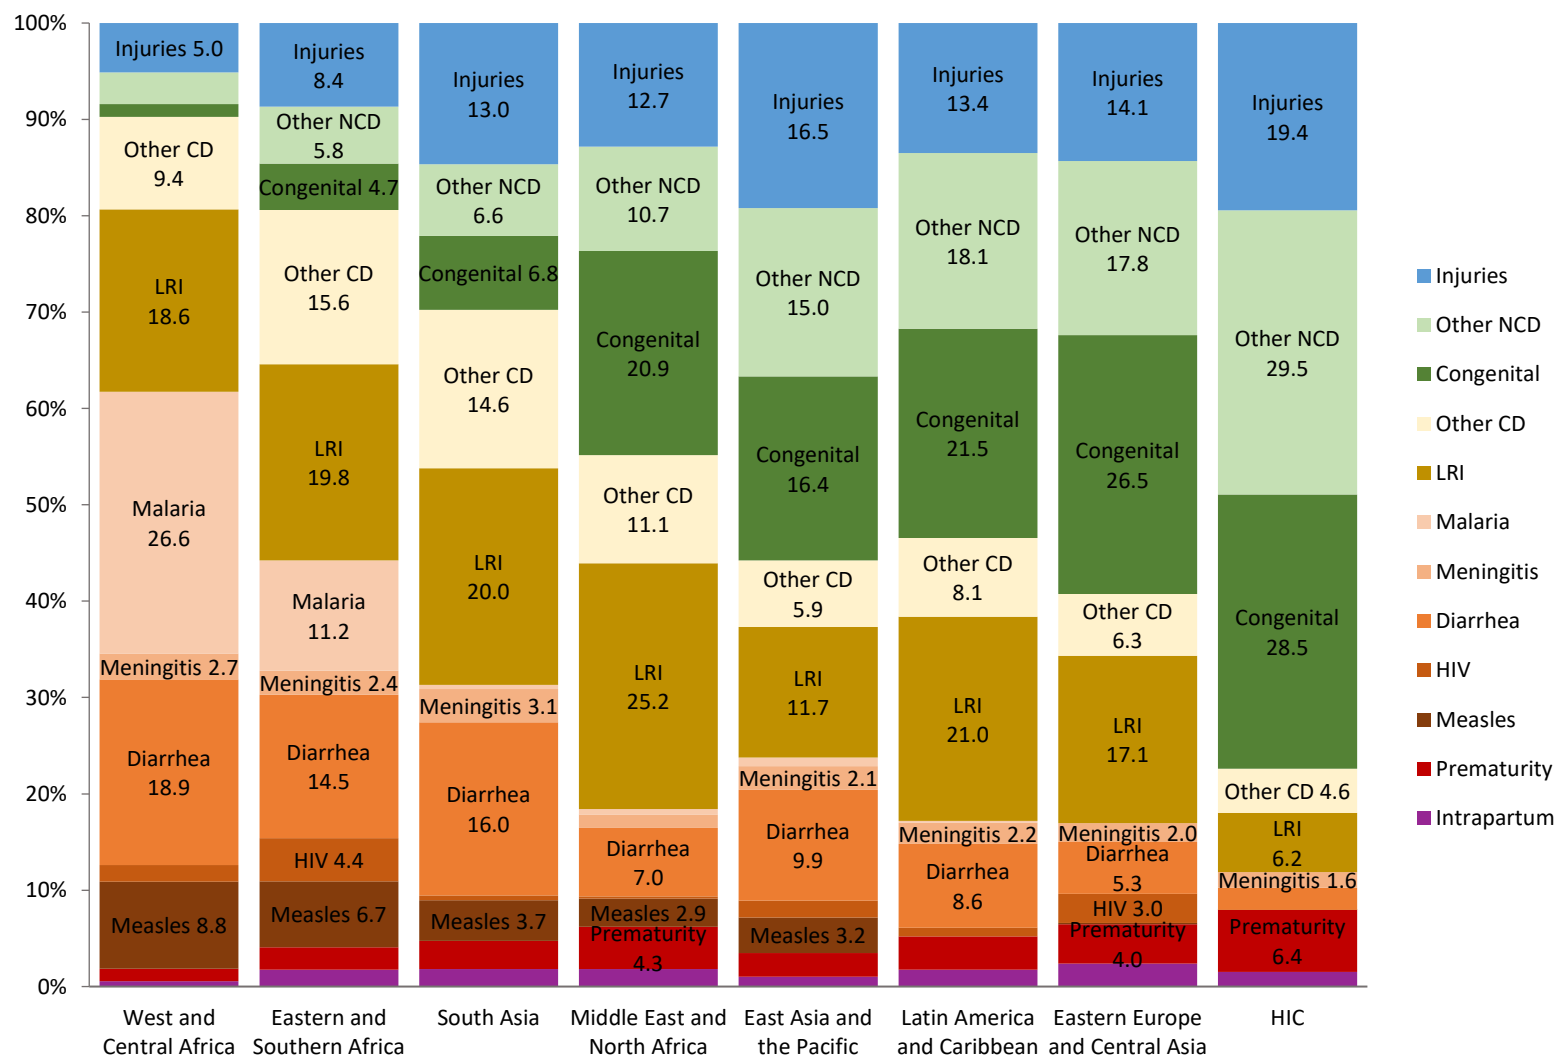

Data source: Cause-of-death distribution in 1-59 month-olds from Perin et al.<sup>7</sup>

**Appendix Figure A7. Regional cause-specific mortality fractions in 5-9 years-old, 2019**

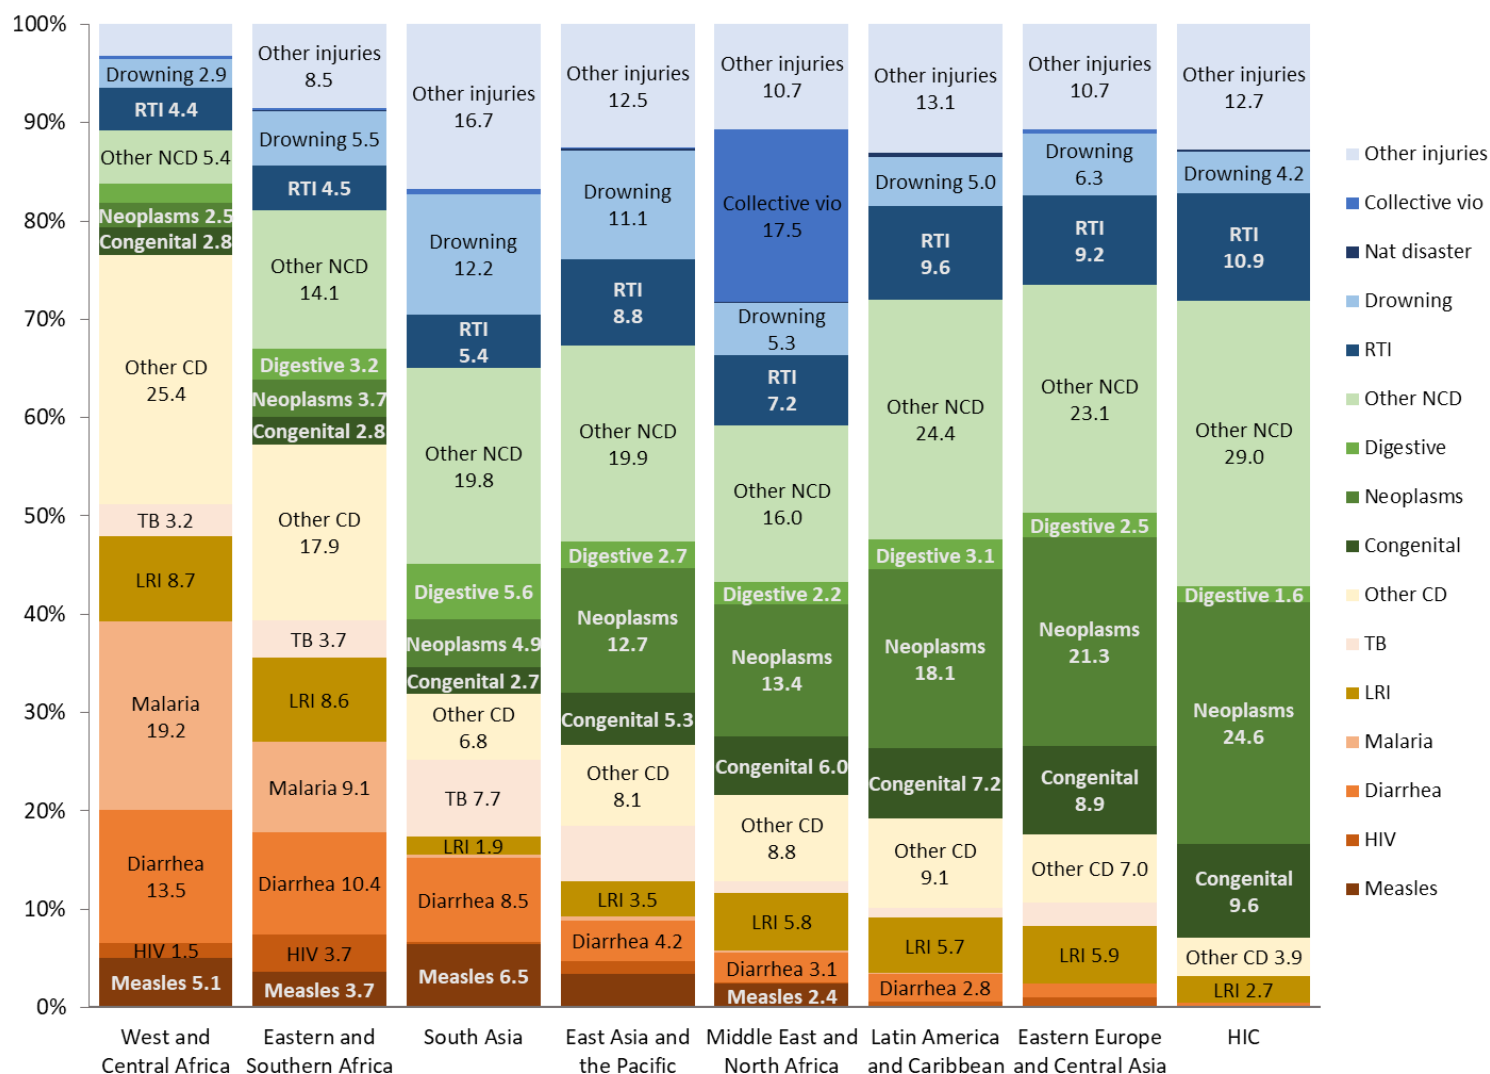

Data source: Cause-of-death distribution in 5-9 years-old from Liu, Villavicencio et al.<sup>8</sup>

**Appendix Figure A8. Regional cause-specific mortality fractions in 10-14 years-old, 2019**

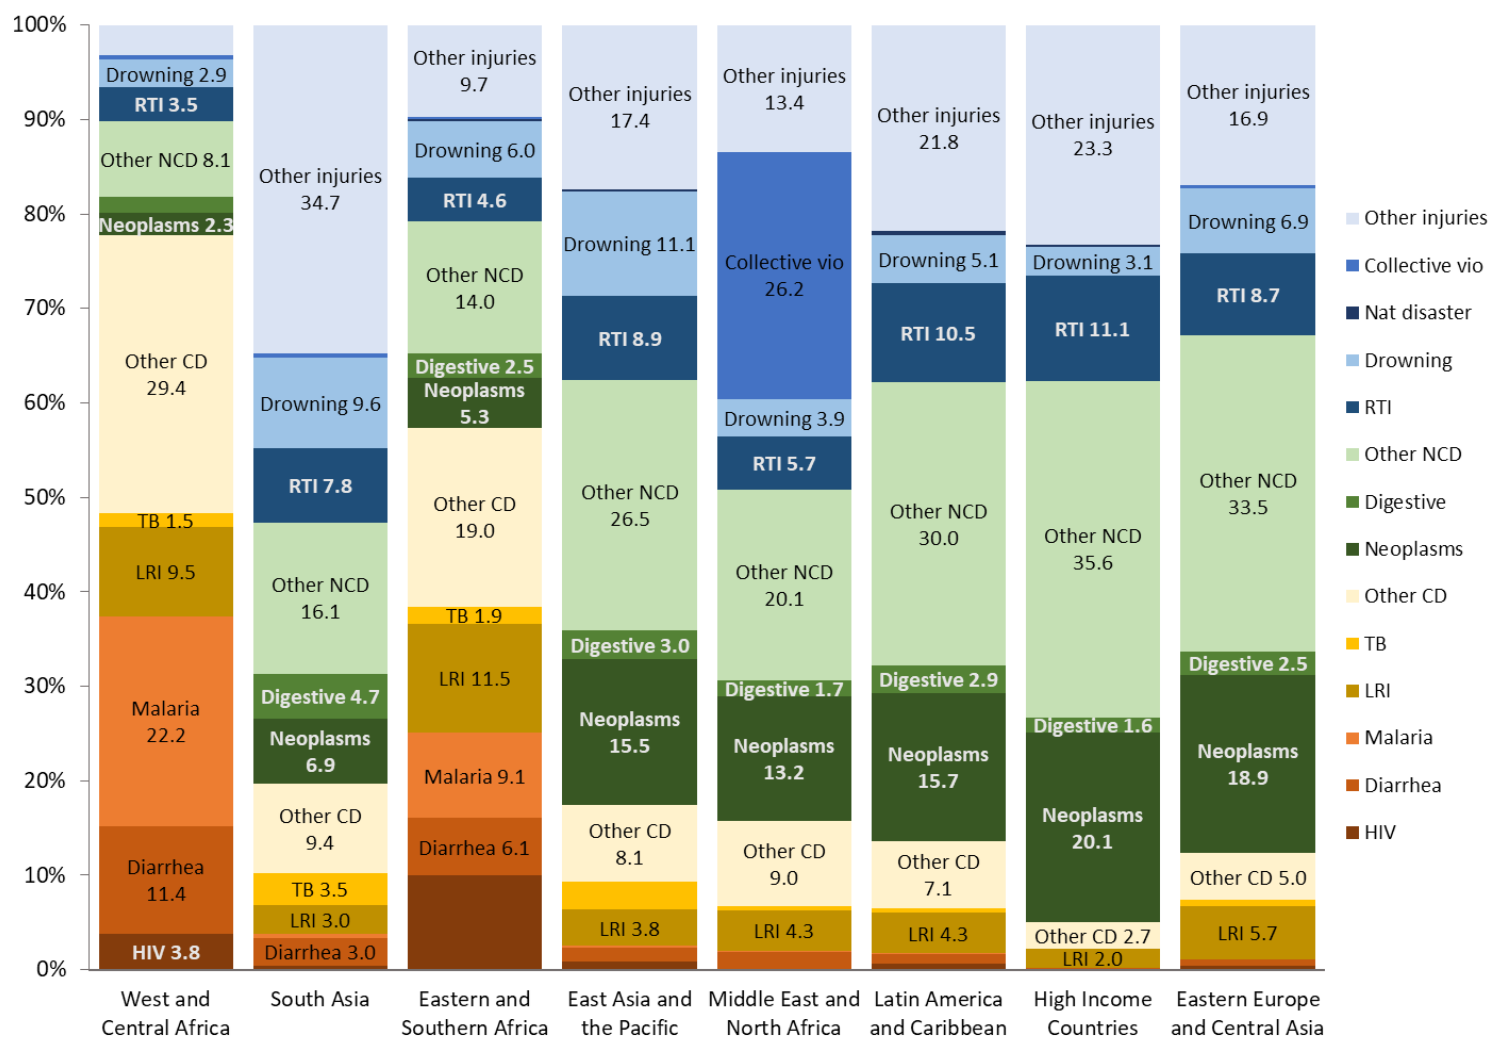

Data source: Cause-of-death distribution in 10-14 years-old from Liu, Villavicencio et al.<sup>8</sup>

**Appendix Figure A9. Regional cause-specific mortality fractions in females 15-19, 2019**

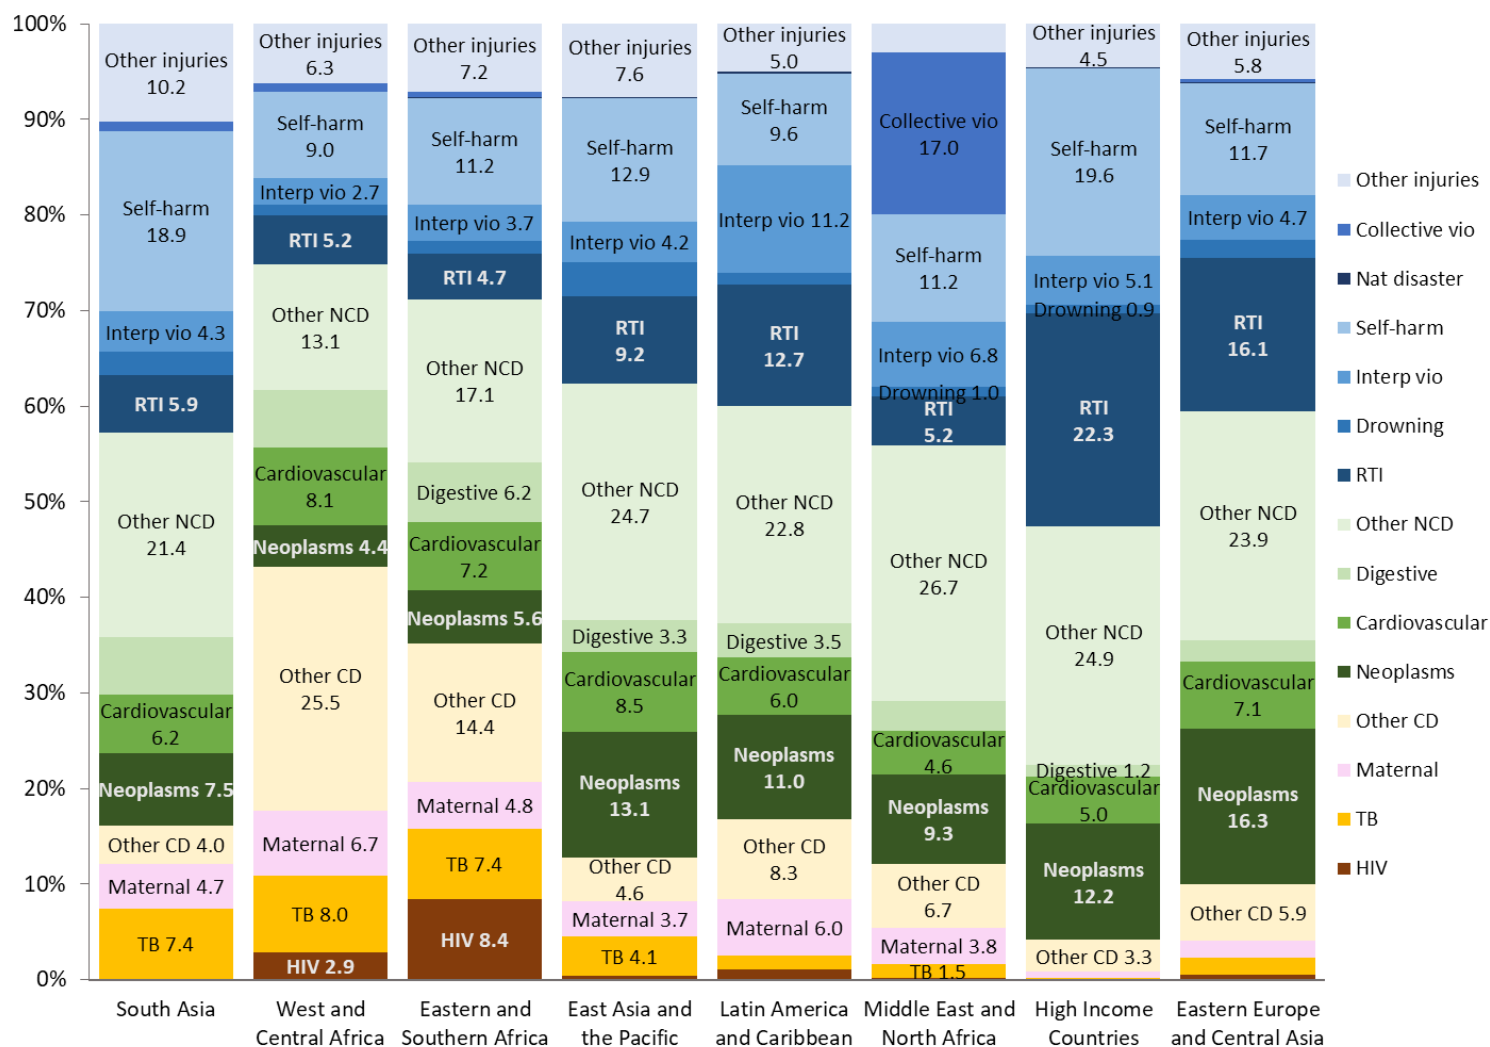

Data source: Cause-of-death distribution in females 15-19 from Liu, Villavicencio et al.<sup>8</sup>

**Appendix Figure A10. Regional cause-specific mortality fractions in males 15-19, 2019**

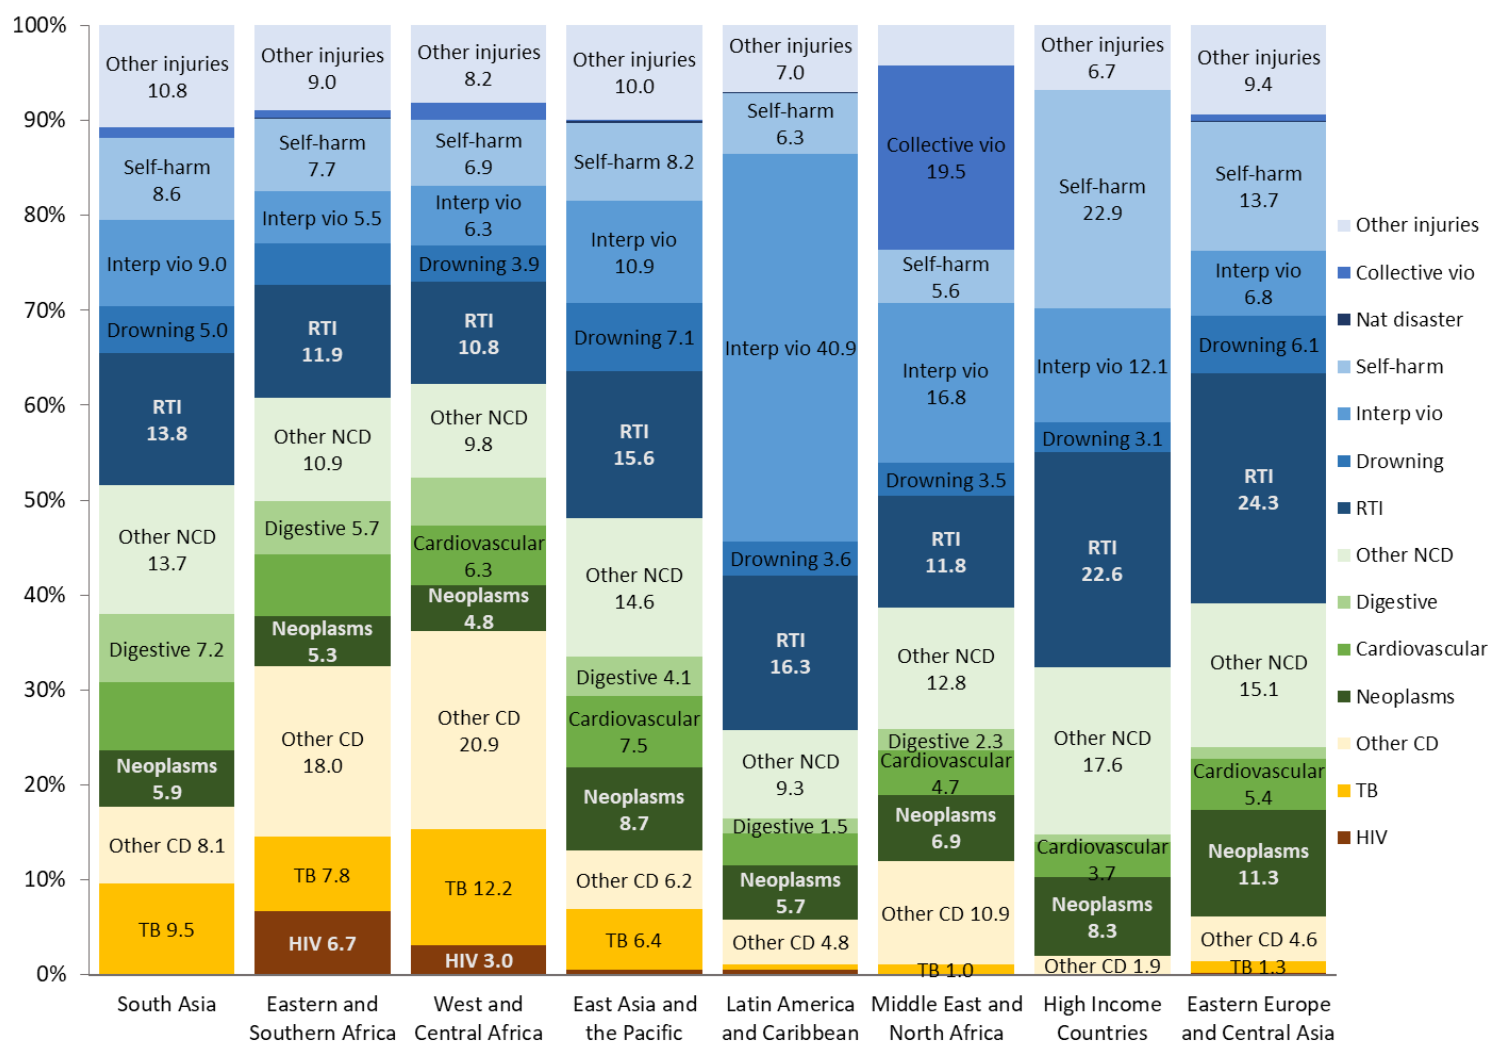

Data source: Cause-of-death distribution in males 15-19 from Liu, Villavicencio et al.<sup>8</sup>

**Appendix Figure A11. Age-specific mortality fractions in fragile states, 2019**

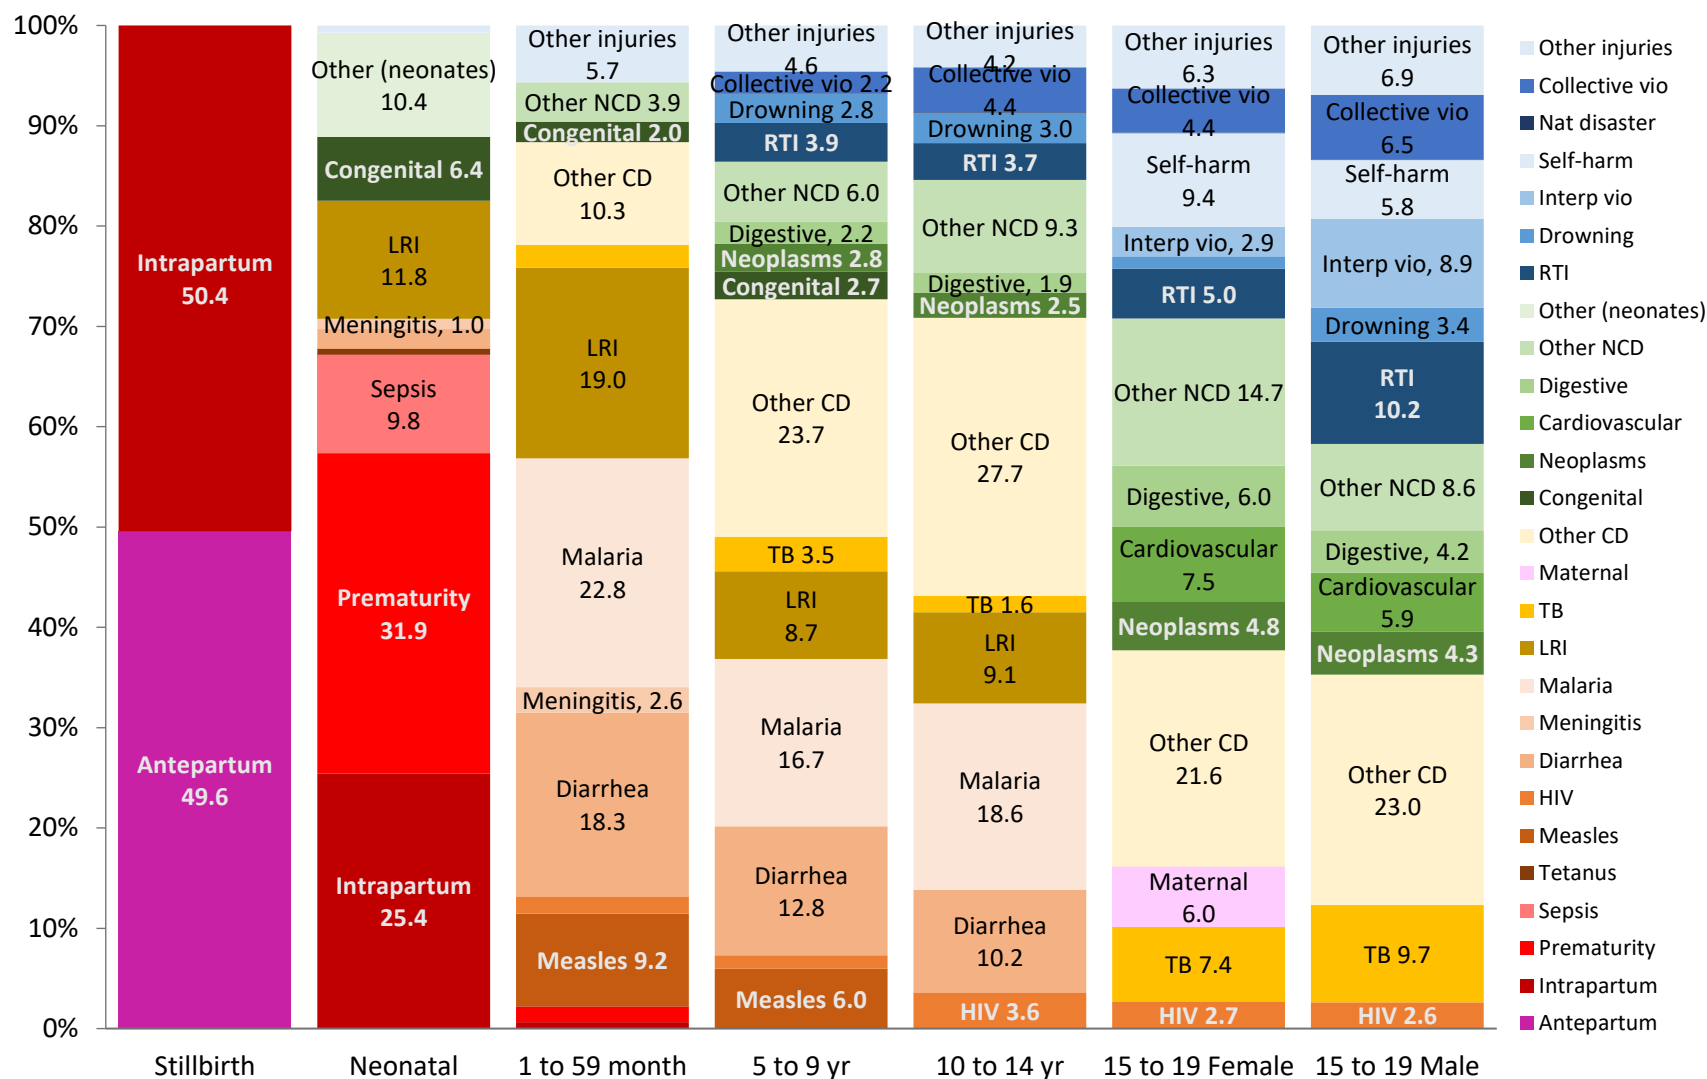

Data source: Cause-of-death distribution in stillbirths from UN IGME<sup>2</sup>, in under-fives from Mulick et al<sup>6</sup>, Perin et al<sup>7</sup> and in 5-19 years-old from Liu, Villavicencio et al.<sup>8</sup>



**Appendix Figure A12. Low Birth Weight (LBW) newborns and rates by world regions in 2015**

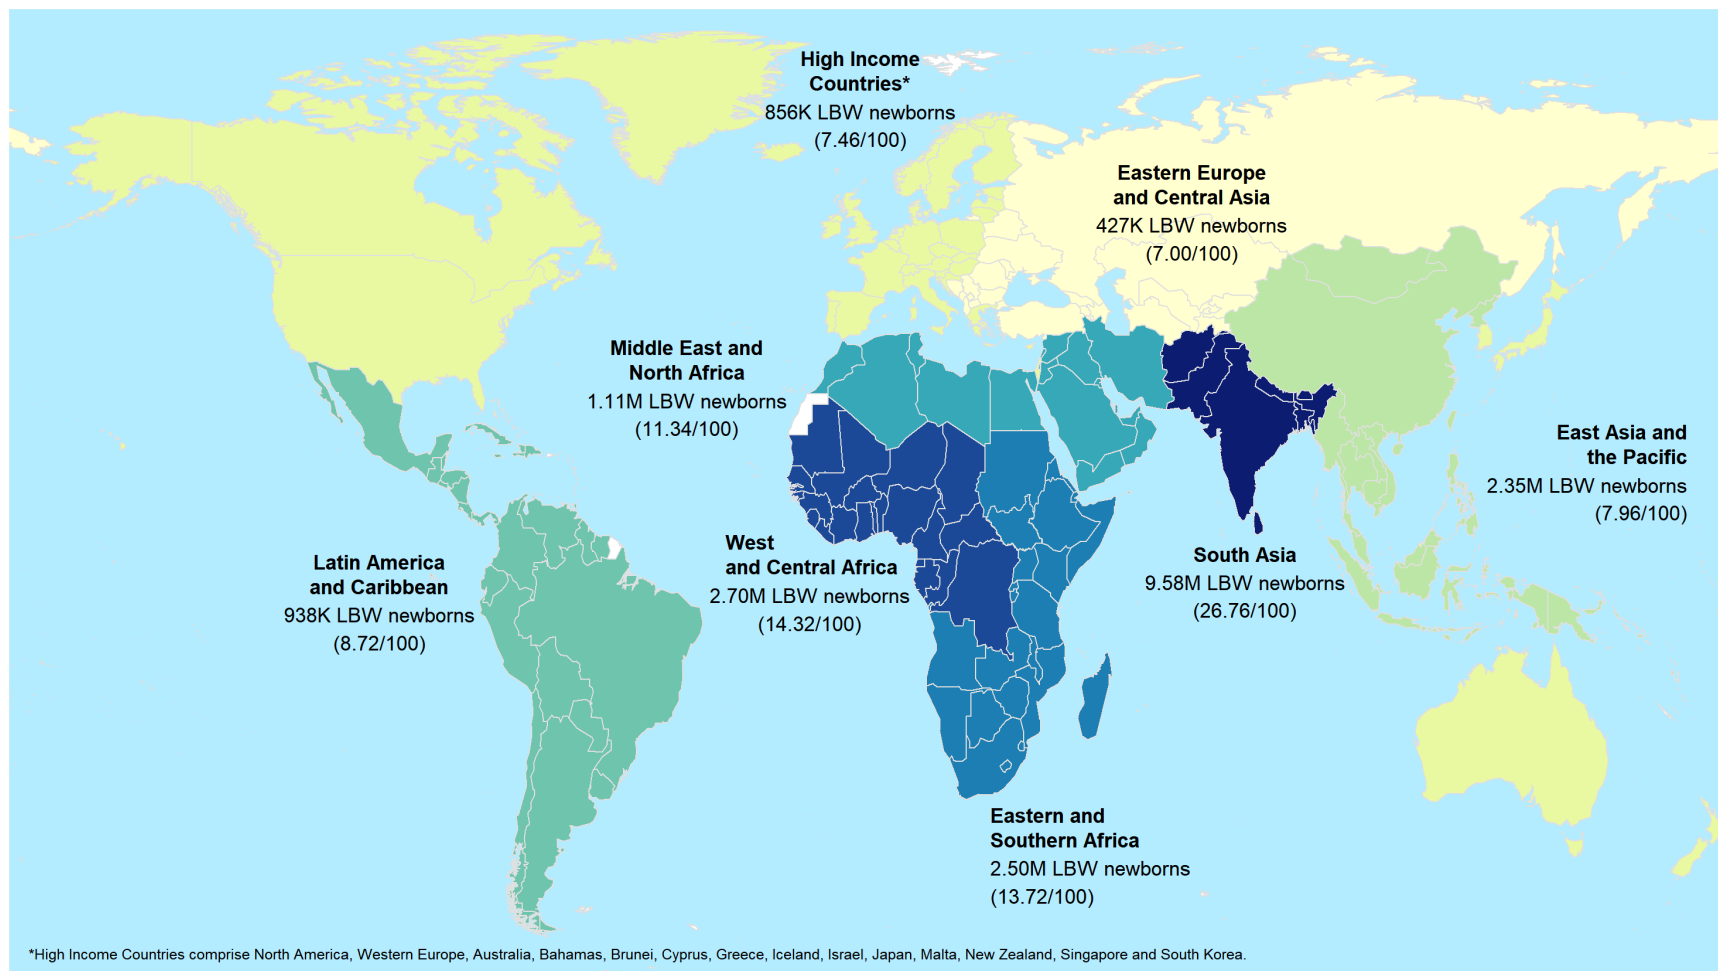

Data source: Blencowe et al.<sup>9</sup>

## Appendix Methods A1. Methods for analysis of national surveys for length/height and Body Mass Index in children under 5y

The International Center for Equity in Health database for the Countdown to 2030 Initiative ([www.equidade.org](http://www.equidade.org)) maintains a database with over 380 nationally representative child health and nutrition surveys, mostly Demographic and Health Surveys (DHS) (<https://dhsprogram.com/what-we-do/survey-Types/dHs.cfm>) and Multiple Indicator Cluster Survey (MICS) (<http://mics.unicef.org/>). Both types of survey programs are highly comparable in terms of sampling, questionnaires and anthropometric methods.<sup>10,11</sup> For the present analyses the most recent survey per country, carried out in 2010 or later, was selected. The median year of the surveys was 2014.

Within each sampled household, children under the age of five years are examined. Measuring boards are used to obtain recumbent length for children under two years and standing height for older children. Weight is measured using portable digital scales. Children under two years of age are weighed while on an adult's lap, and adult's weight is subtracted.<sup>12,13</sup> Length or height for age and body mass index (BMI) for age are expressed as Z scores relative to the median of the WHO Child Growth Standards.<sup>14</sup> Ages of the children were estimated by subtracting the birth date from the interview date; if information is only available for the month of birth, and the 15<sup>th</sup> of each month was used as the day of birth. All analyses took into account the complex nature of the samples.

Mean height or length, and mean BMI was calculated for each month of age, in each national sample. Regional means were calculated as the weighted average of countries in each region, using under-five population as weights (<https://data.unicef.org/resources/dataset/malnutrition-data/>). Local polynomial modeling<sup>15</sup> was used to produce graphs of mean length or height and mean BMI by age using the Stata command `lpoly` (version 15.0, StataCorp, College Station, TX, USA).

Data were available for 87 countries. These account for **87%** of all low-income, **67%** of lower-middle income, and **49%** of upper-middle income countries according to the World Bank classification in 2015. The table below shows their distribution by region of the world.

### Distribution of countries with information on length/height or BMI included in the analyses, by region of the world.

| UNICEF region                 | countries |
|-------------------------------|-----------|
| West & Central Africa         | 22        |
| Eastern & Southern Africa     | 17        |
| Middle East & North Africa    | 8         |
| Eastern Europe & Central Asia | 12        |
| South Asia                    | 6         |
| East Asia & the Pacific       | 7         |
| Latin America & Caribbean     | 15        |
| <b>All regions</b>            | <b>87</b> |

**Appendix Figure A13. Mean HAZ by age and sex, West & Central Africa**

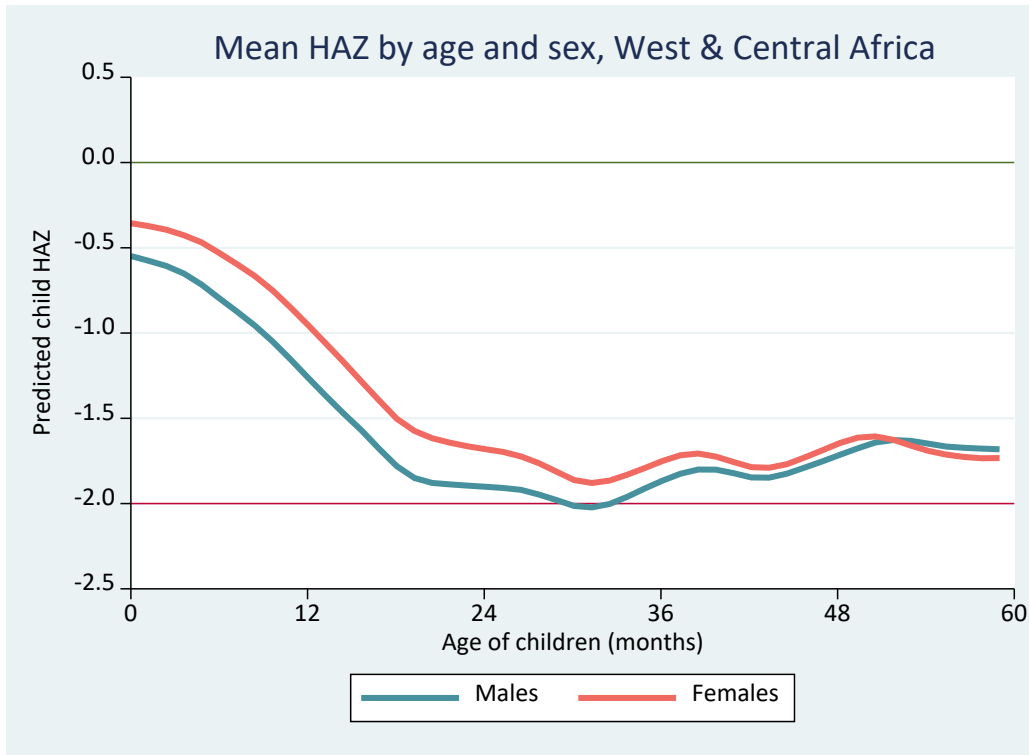

**Appendix Figure A14. Mean HAZ by age and sex, Eastern & Southern Africa**

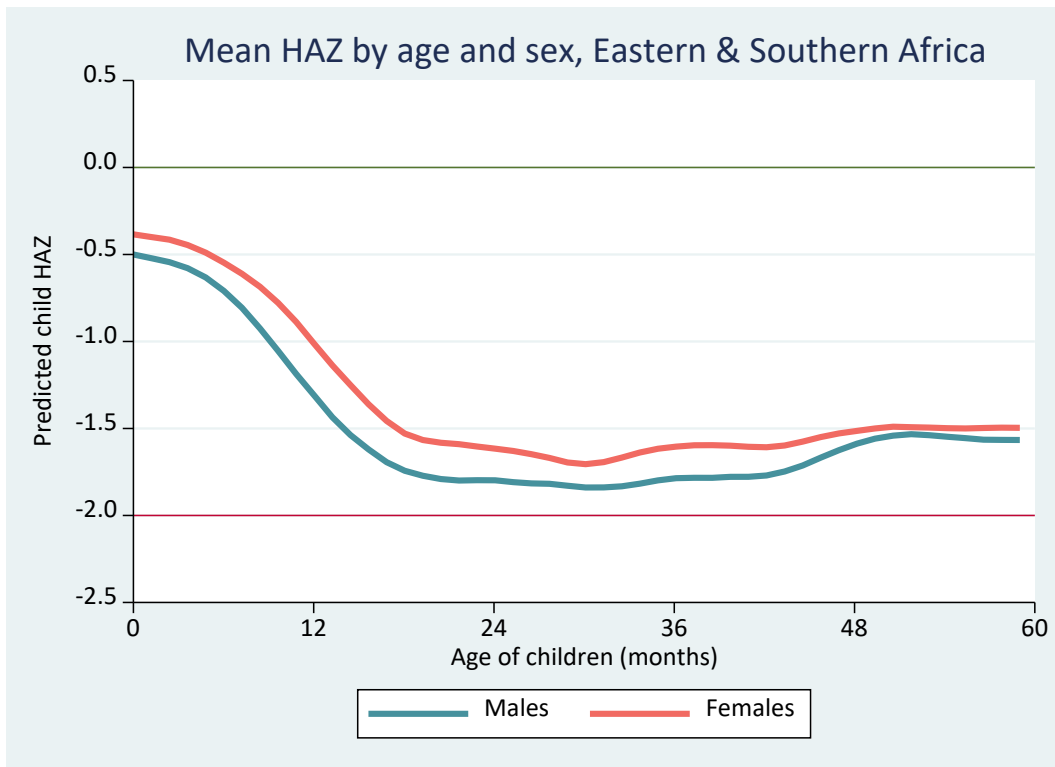

**Appendix Figure A15. Mean HAZ by age and sex, Middle East & North Africa**

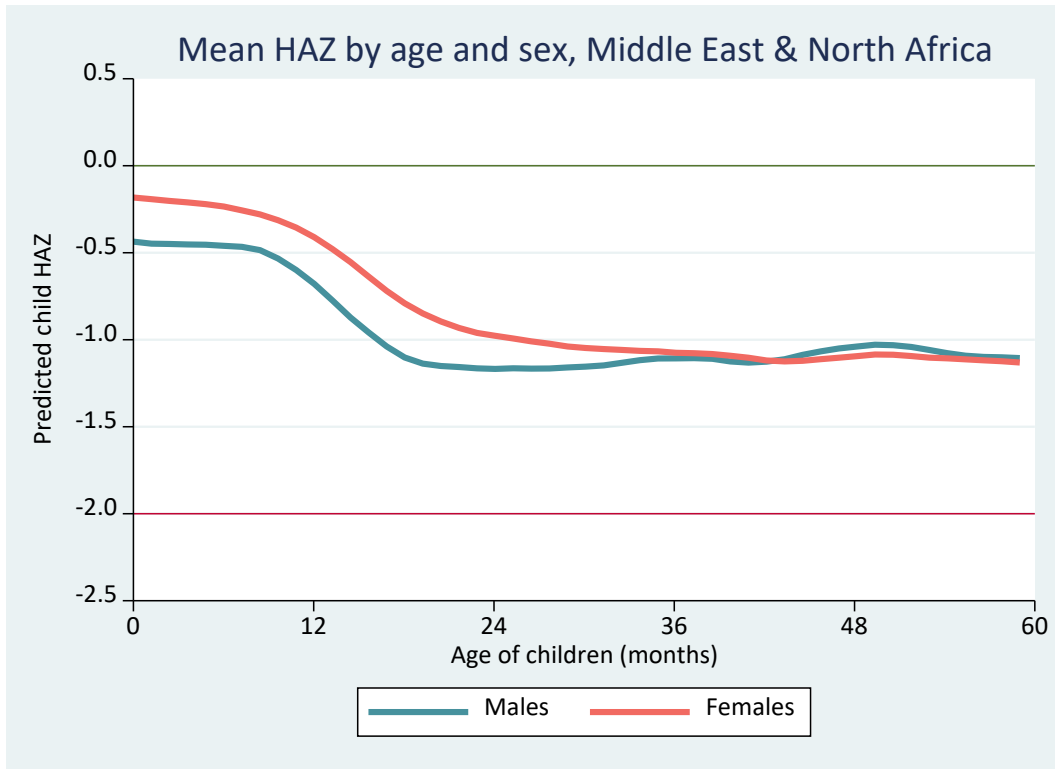

**Appendix Figure A16. Mean HAZ by age and sex, Eastern Europe & Central Asia**

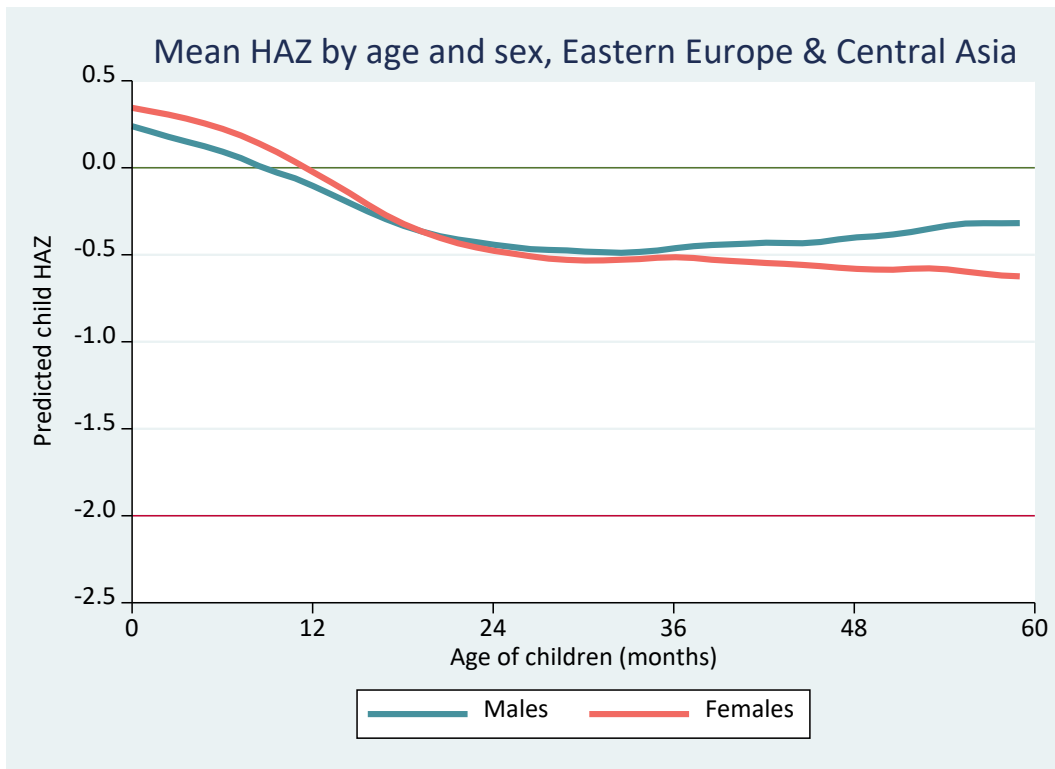

**Appendix Figure A17. Mean HAZ by age and sex, South Asia**

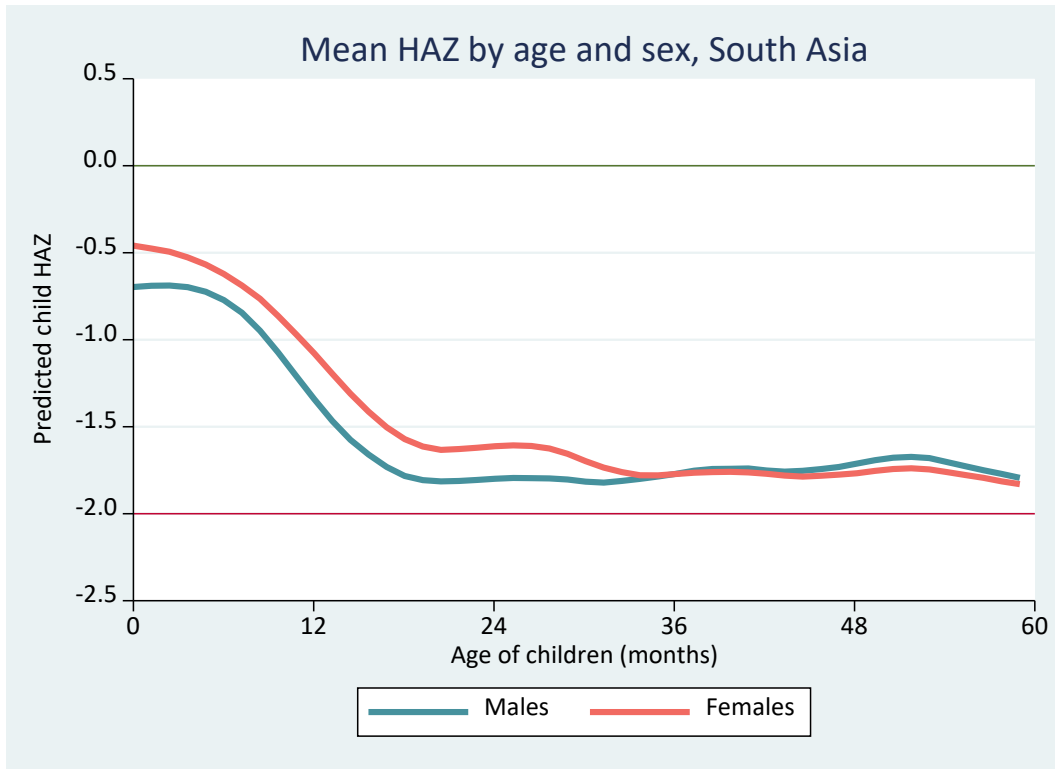

**Appendix Figure A18. Mean HAZ by age and sex, East Asia & the Pacific**

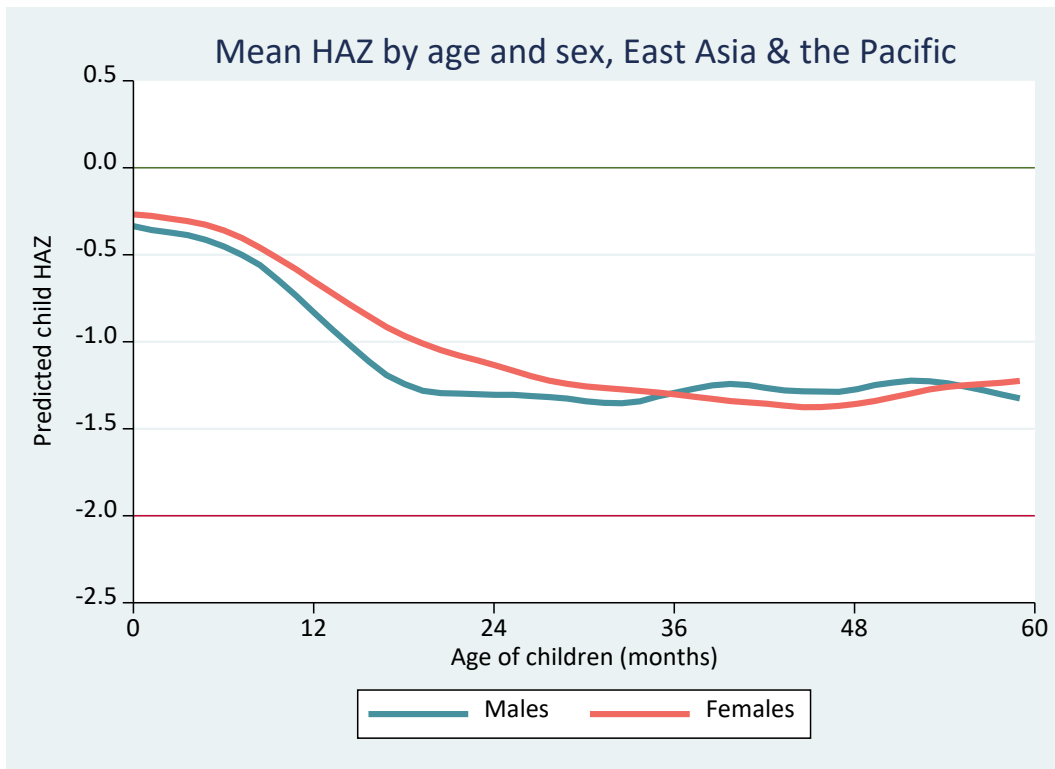

Appendix Figure A19. Mean HAZ by age and sex, Latin America & Caribbean

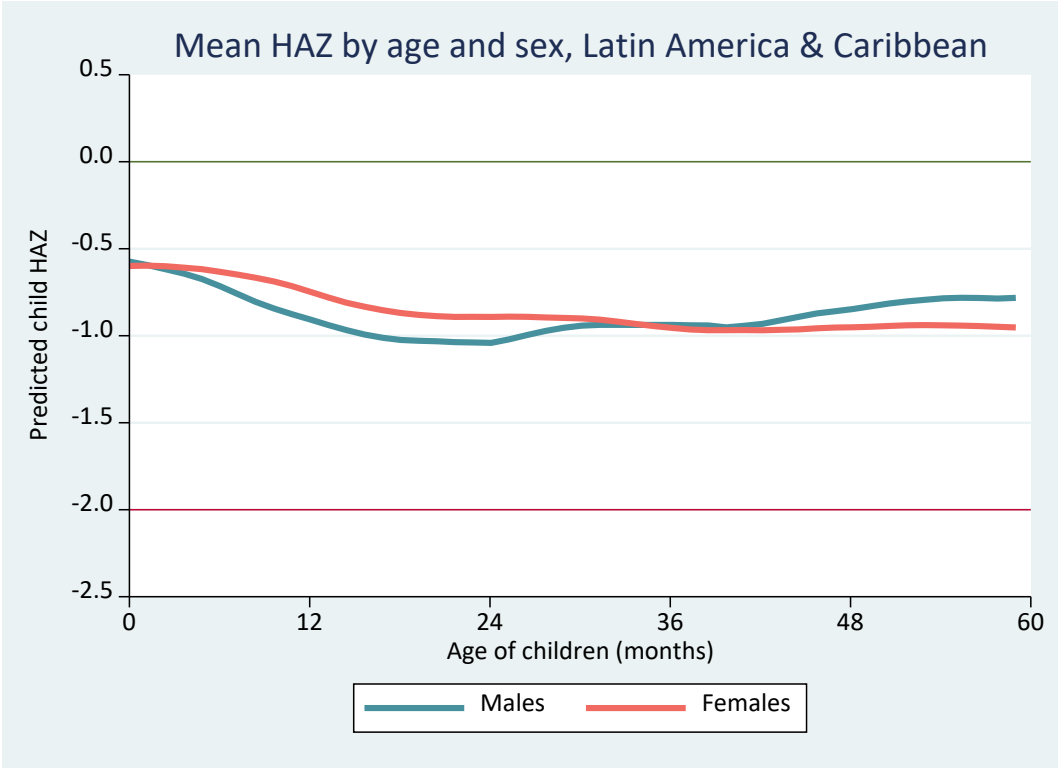

**Appendix Figure A20. Mean BAZ by age and sex, West & Central Africa**

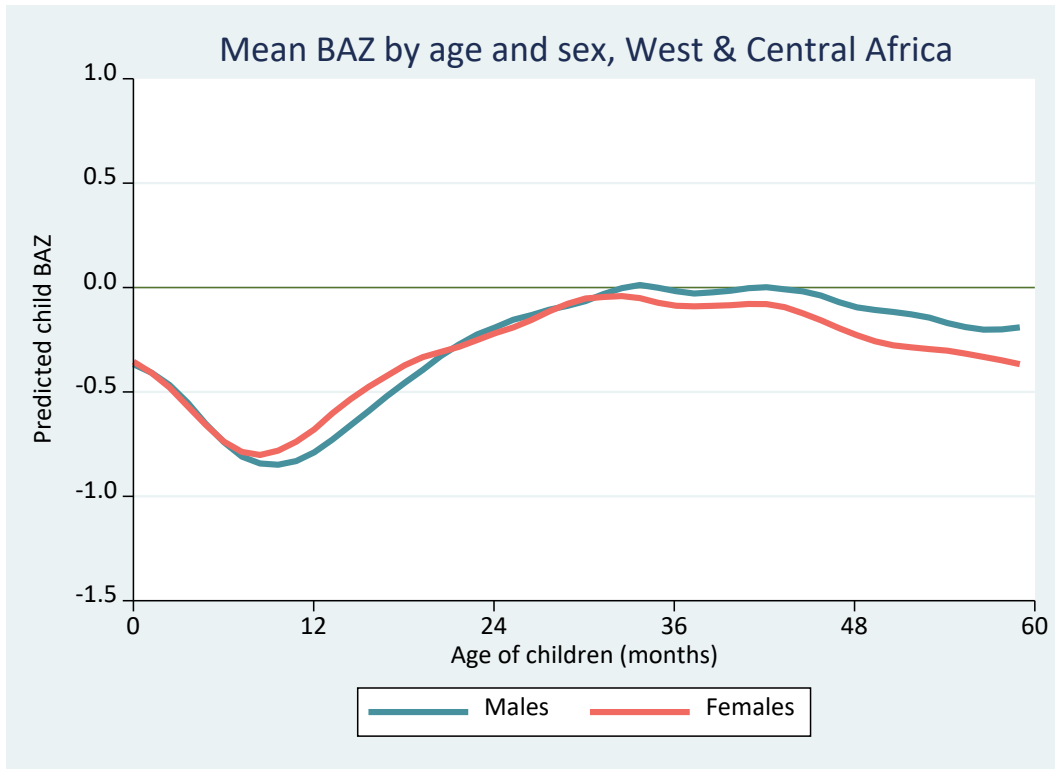

**Appendix Figure A21. Mean BAZ by age and sex, Eastern & Southern Africa**

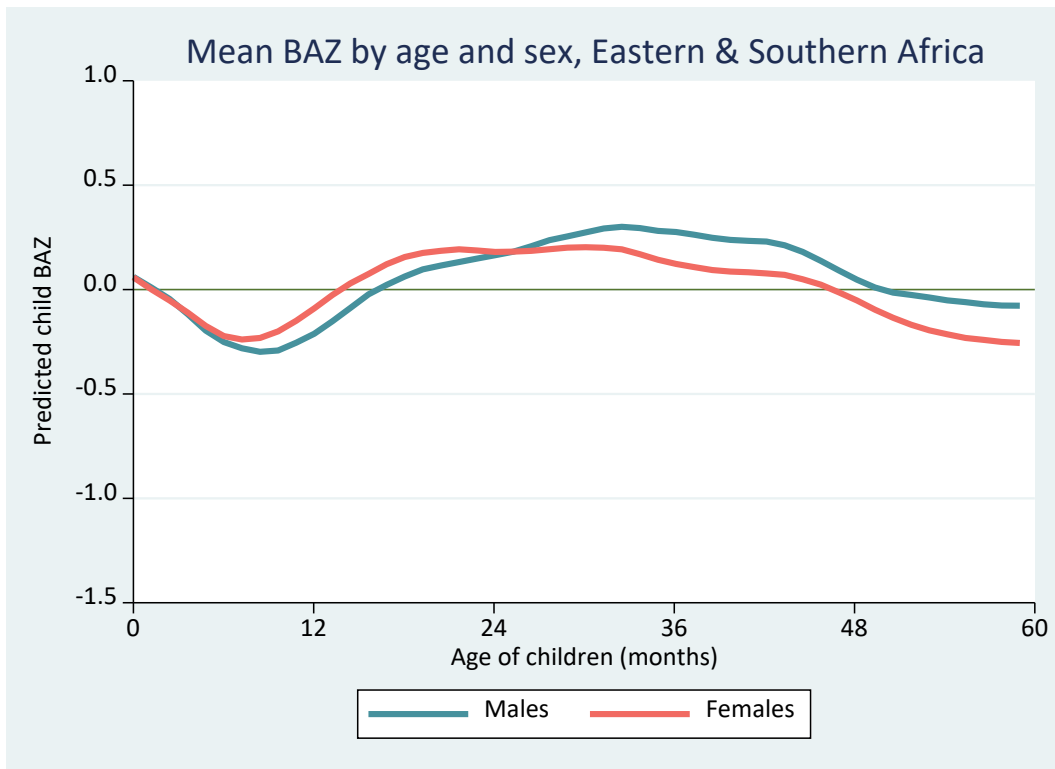

**Appendix Figure A22. Mean BAZ by age and sex, Middle East & North Africa**

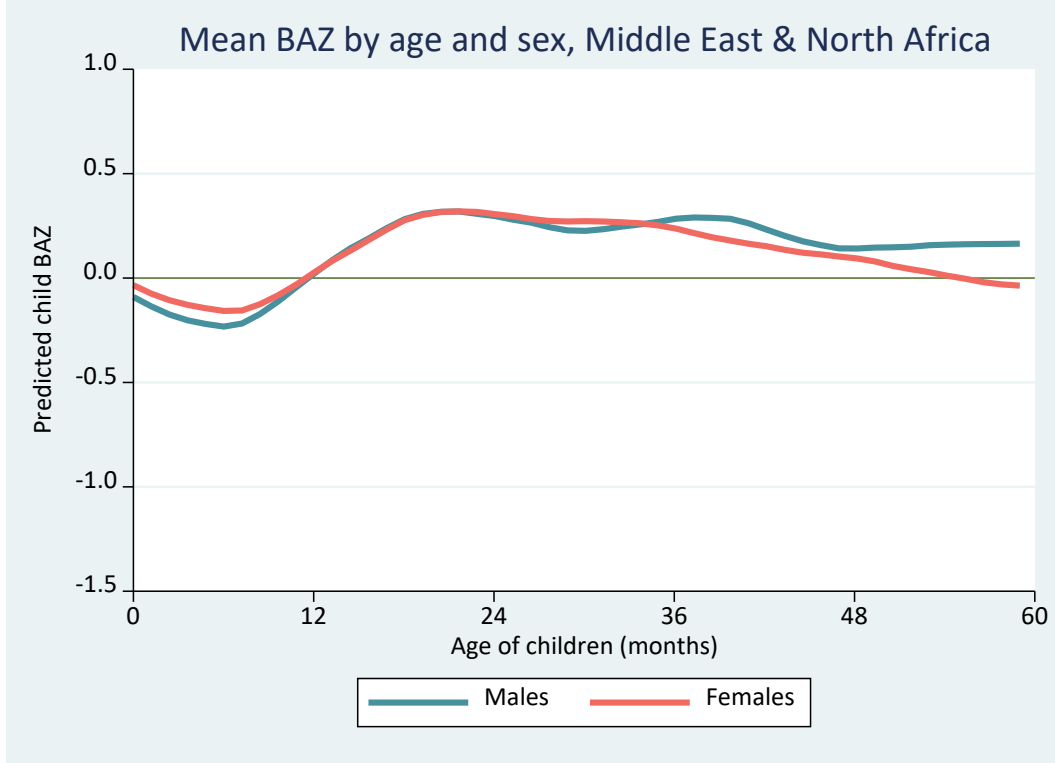

**Appendix Figure A23. Mean BAZ by age and sex, Eastern Europe & Central Asia**

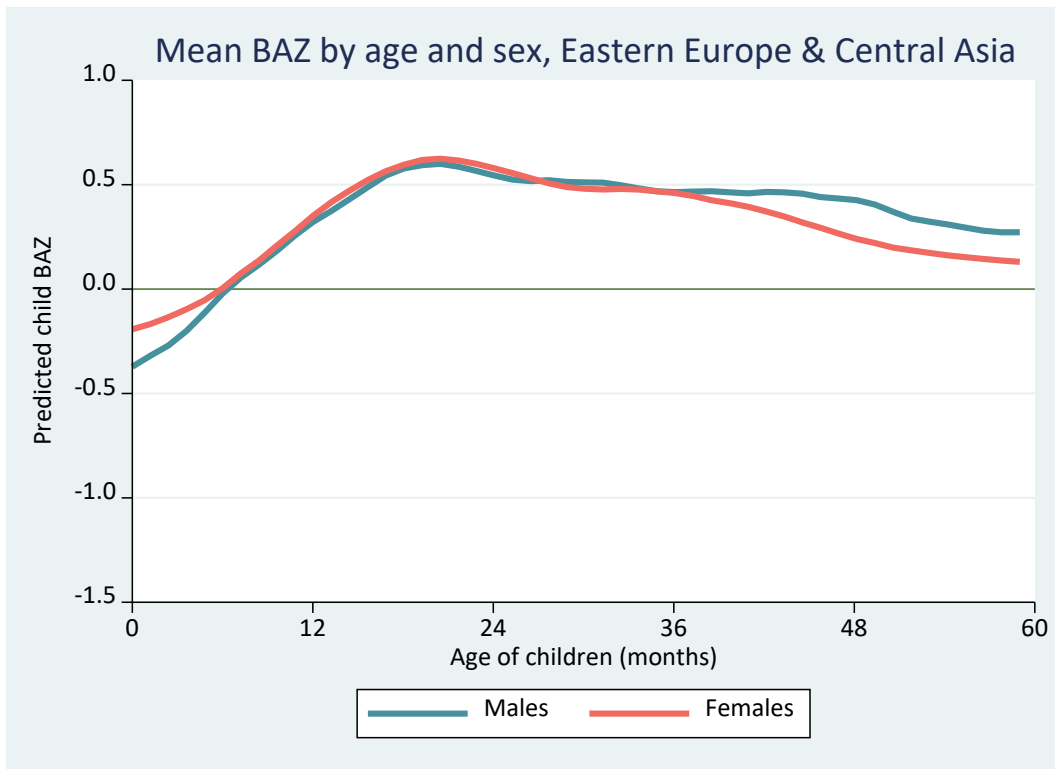



**Appendix Figure A24. Mean BAZ by age and sex, South Asia**

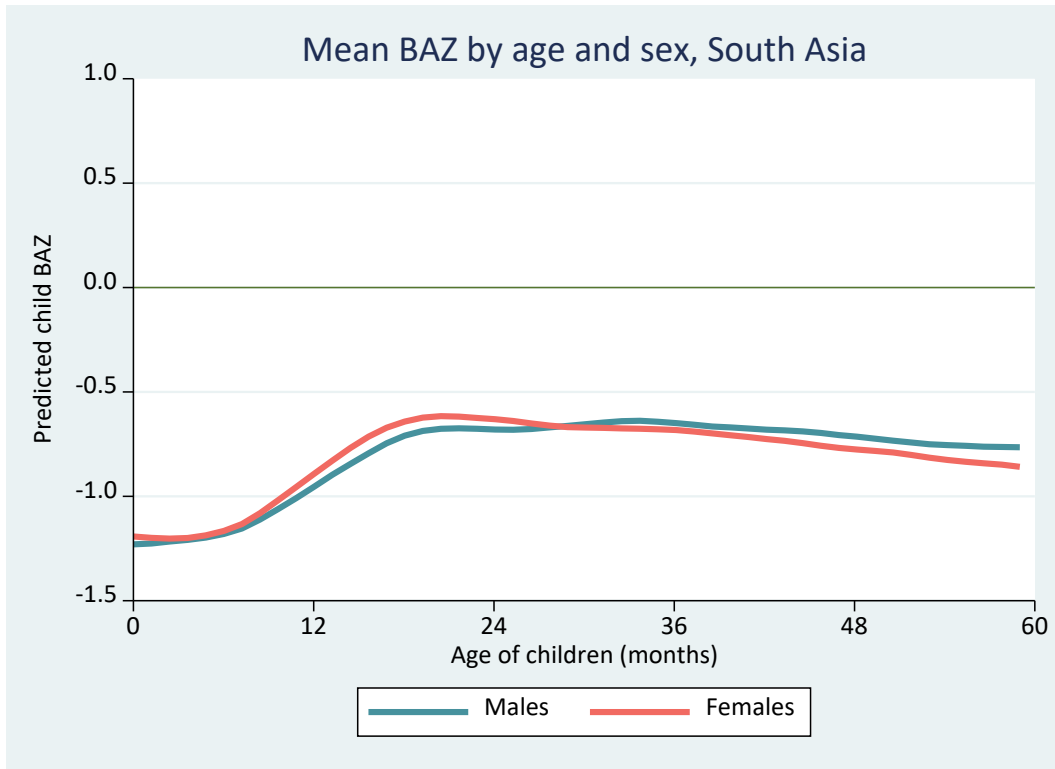

**Appendix Figure A25. Mean BAZ by age and sex, East Asia & the Pacific**

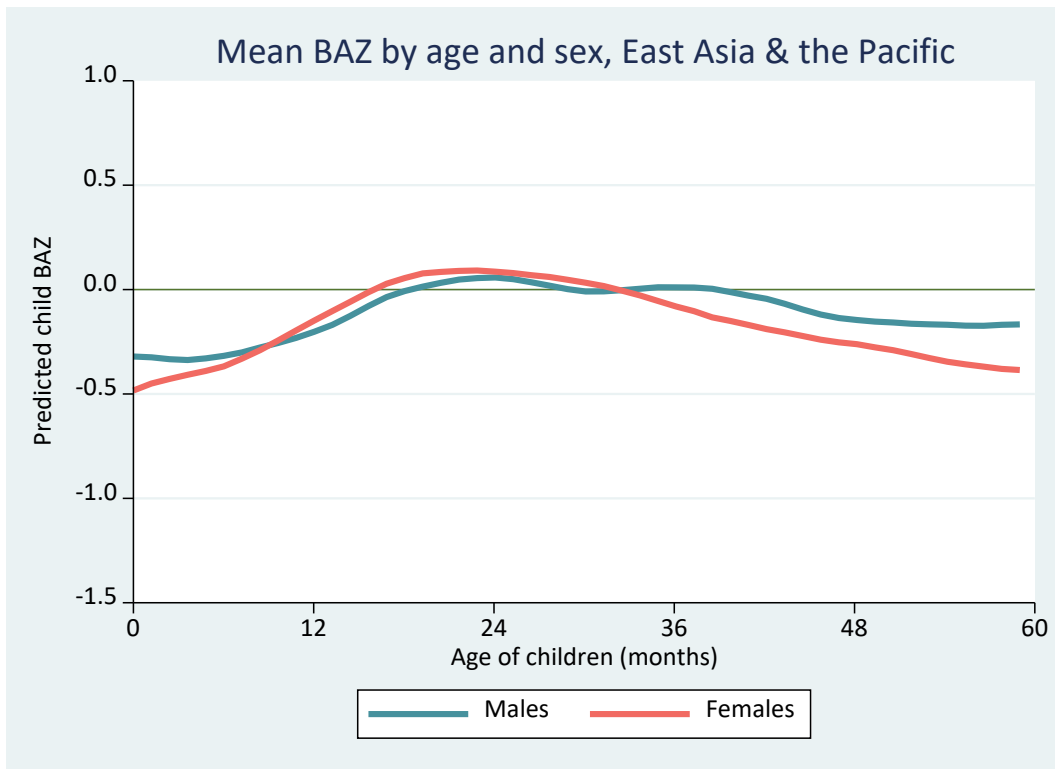

Appendix Figure A26. Mean BAZ by age and sex, Latin America & Caribbean

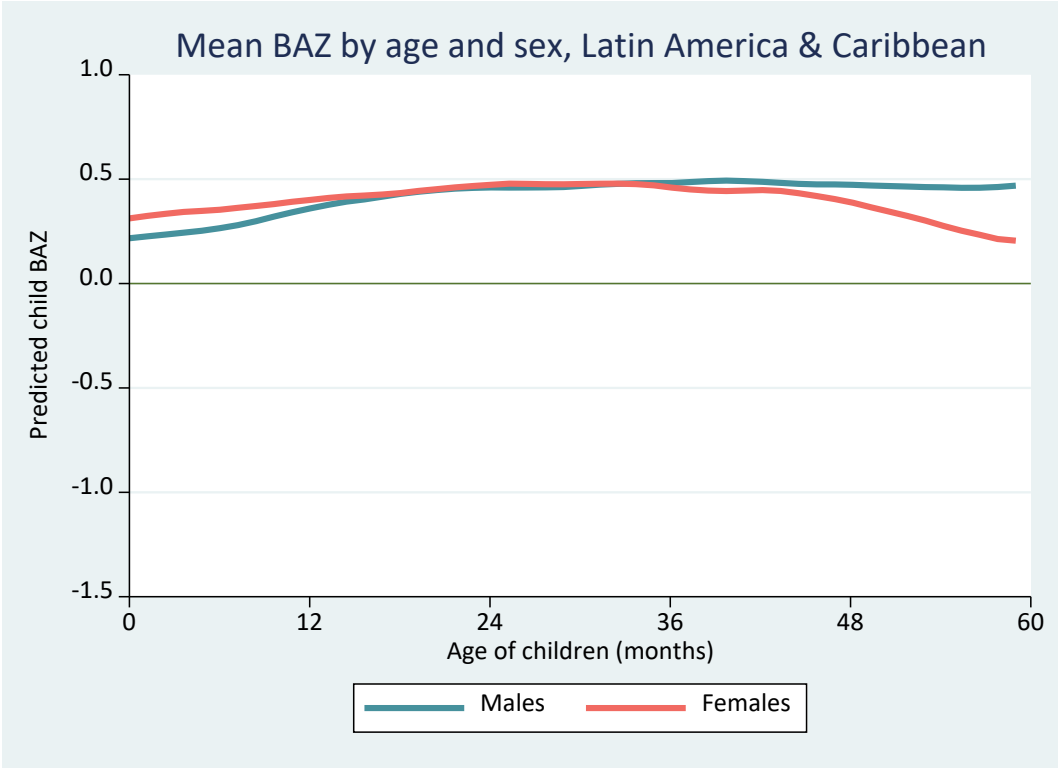

Appendix Figure A27. World map of height for 19-year-old girls by world region

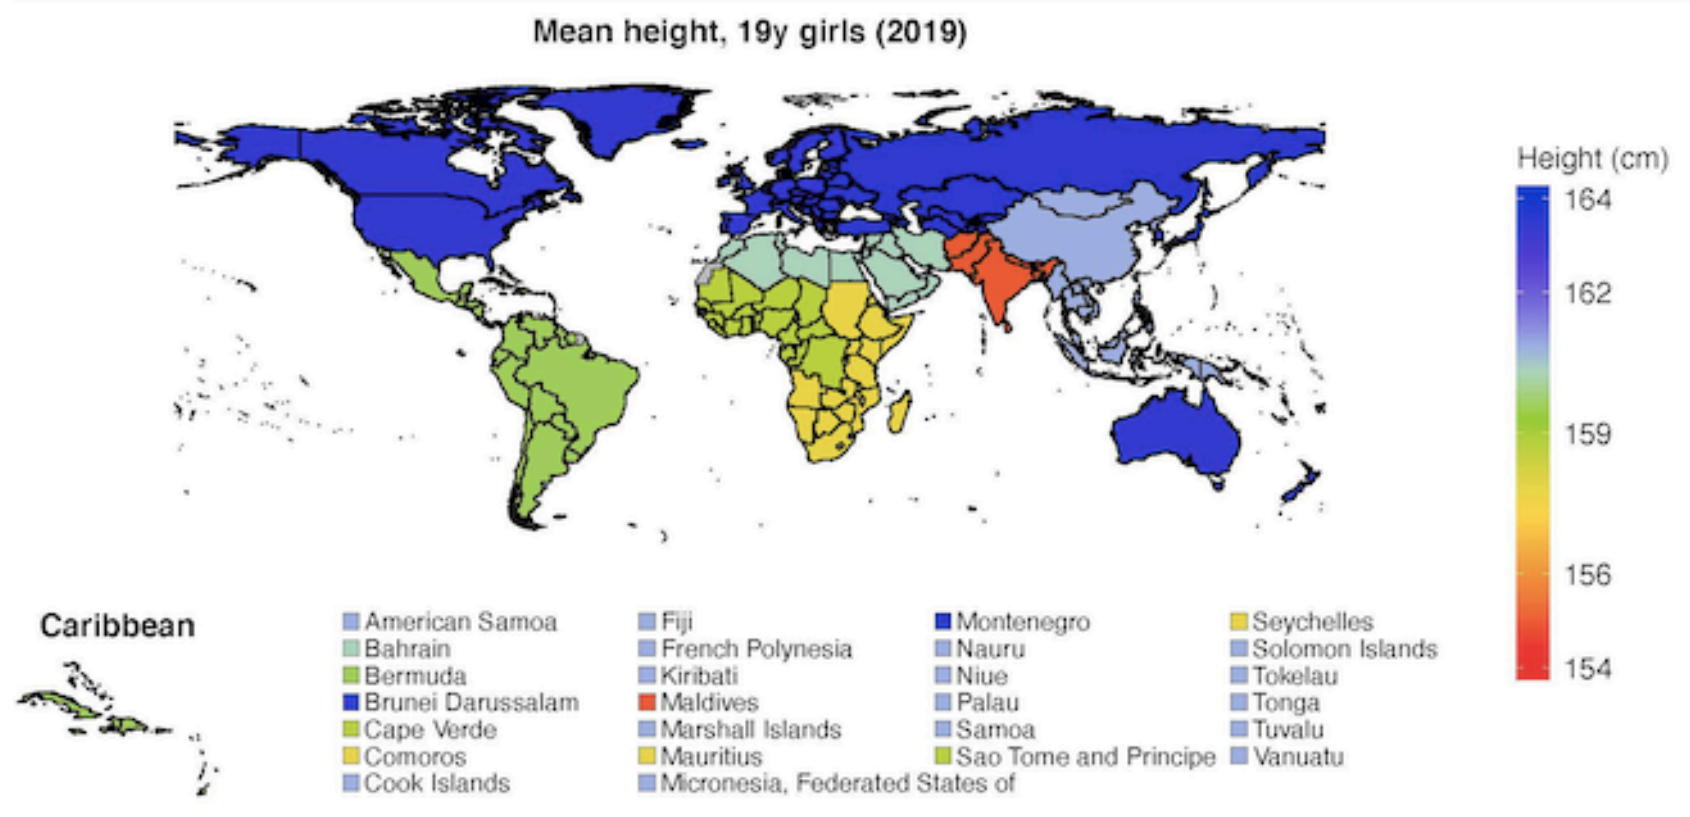

Appendix Figure A28. World map of height for 19-year-old boys by world region

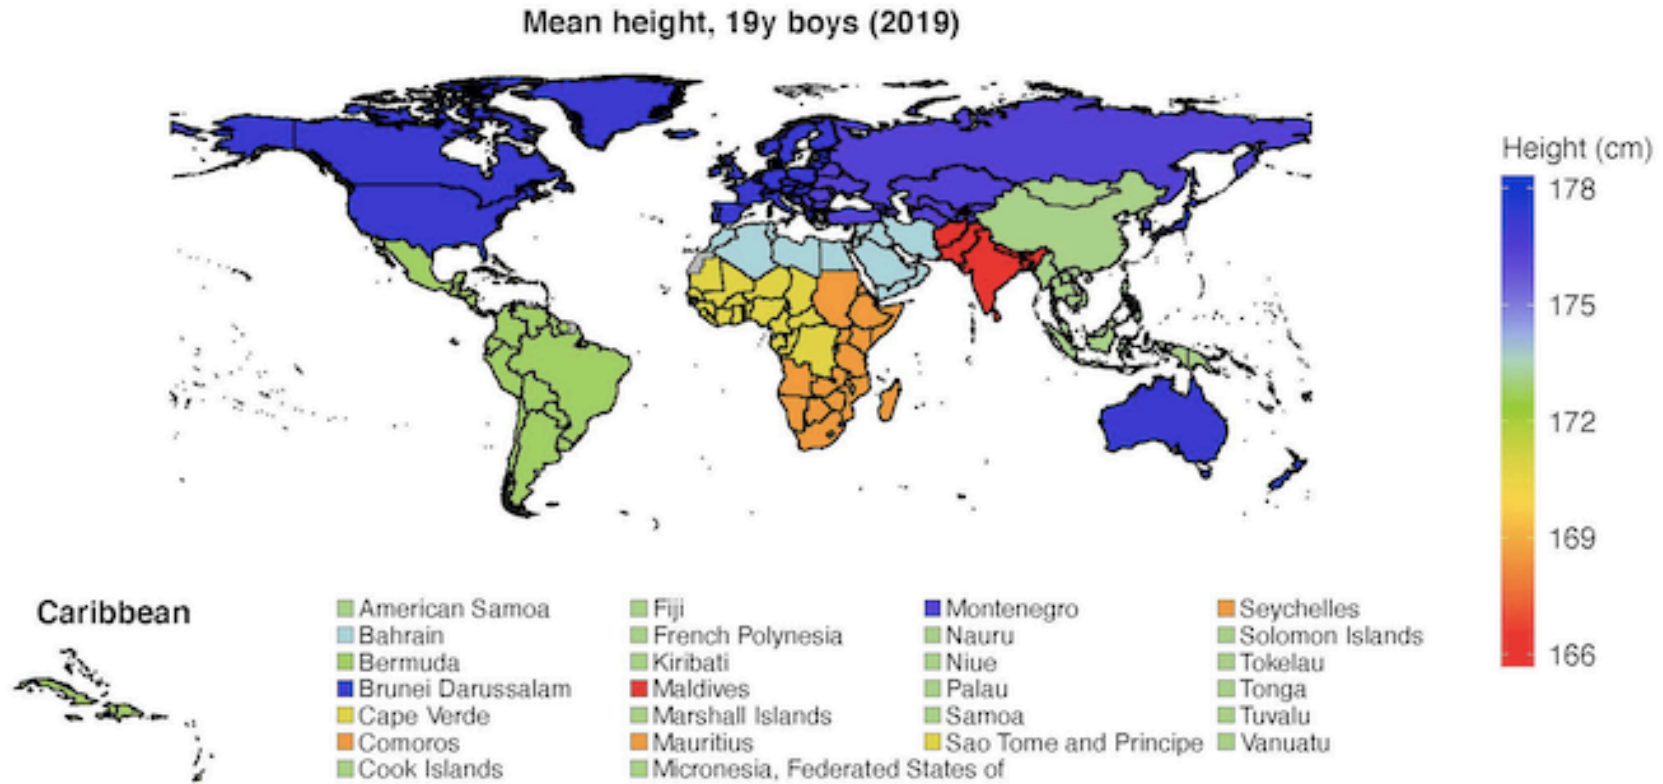

Appendix Figure A29. World map of Body Mass Index (BMI) for 19-year-old girls by world region

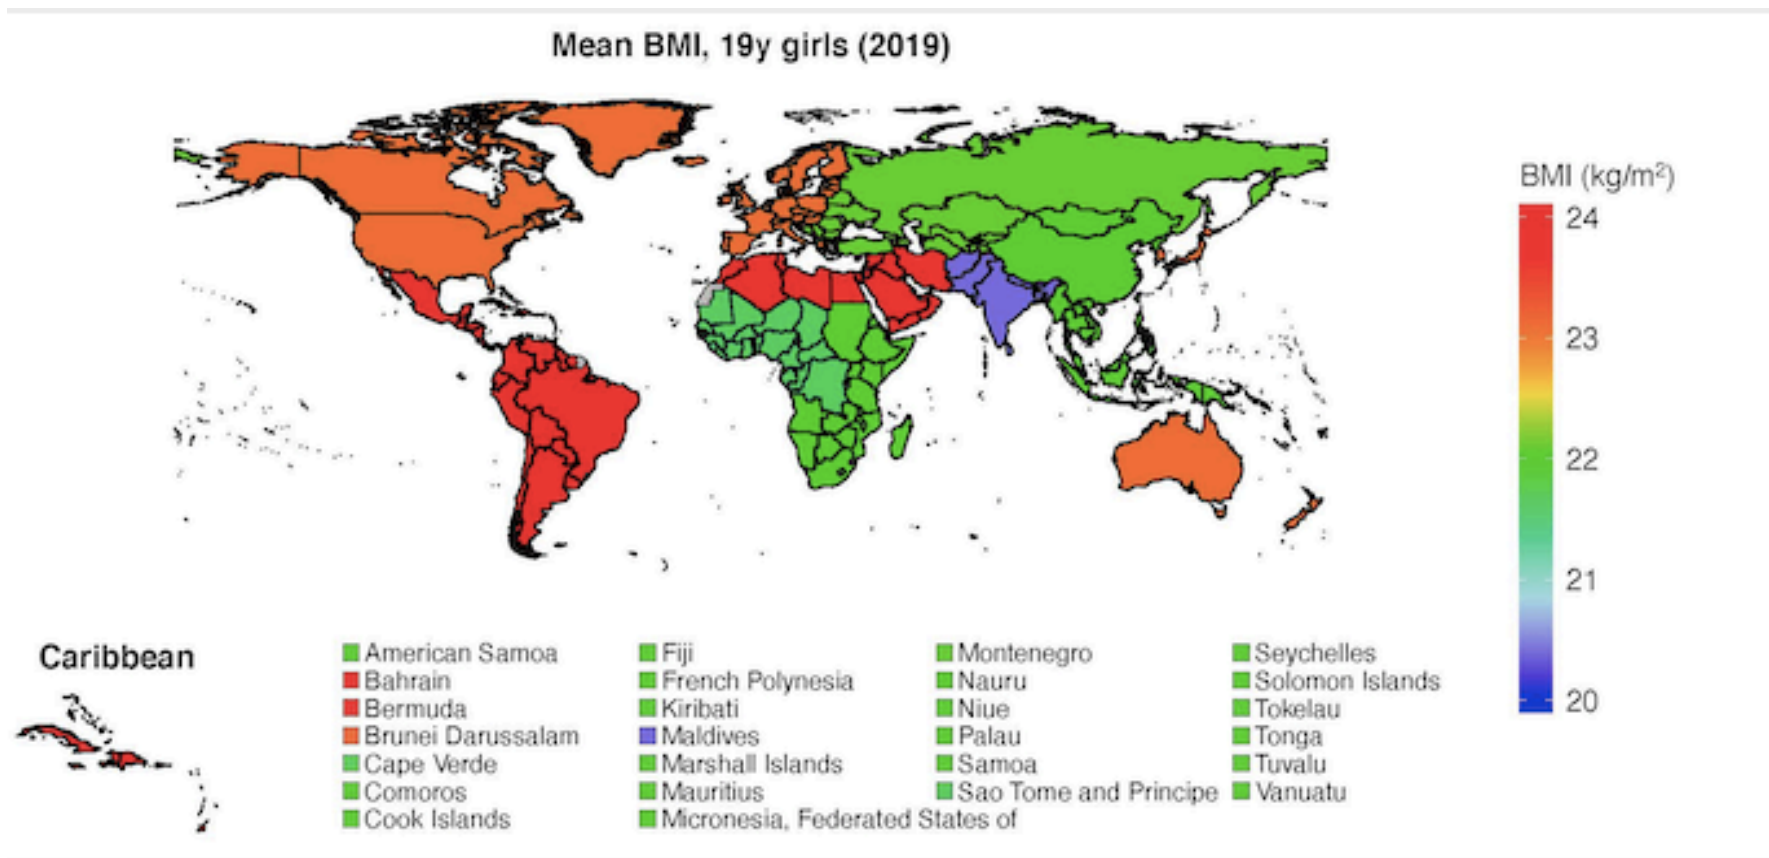

Appendix Figure A30. World map of Body Mass Index (BMI) for 19-year-old boys by world region

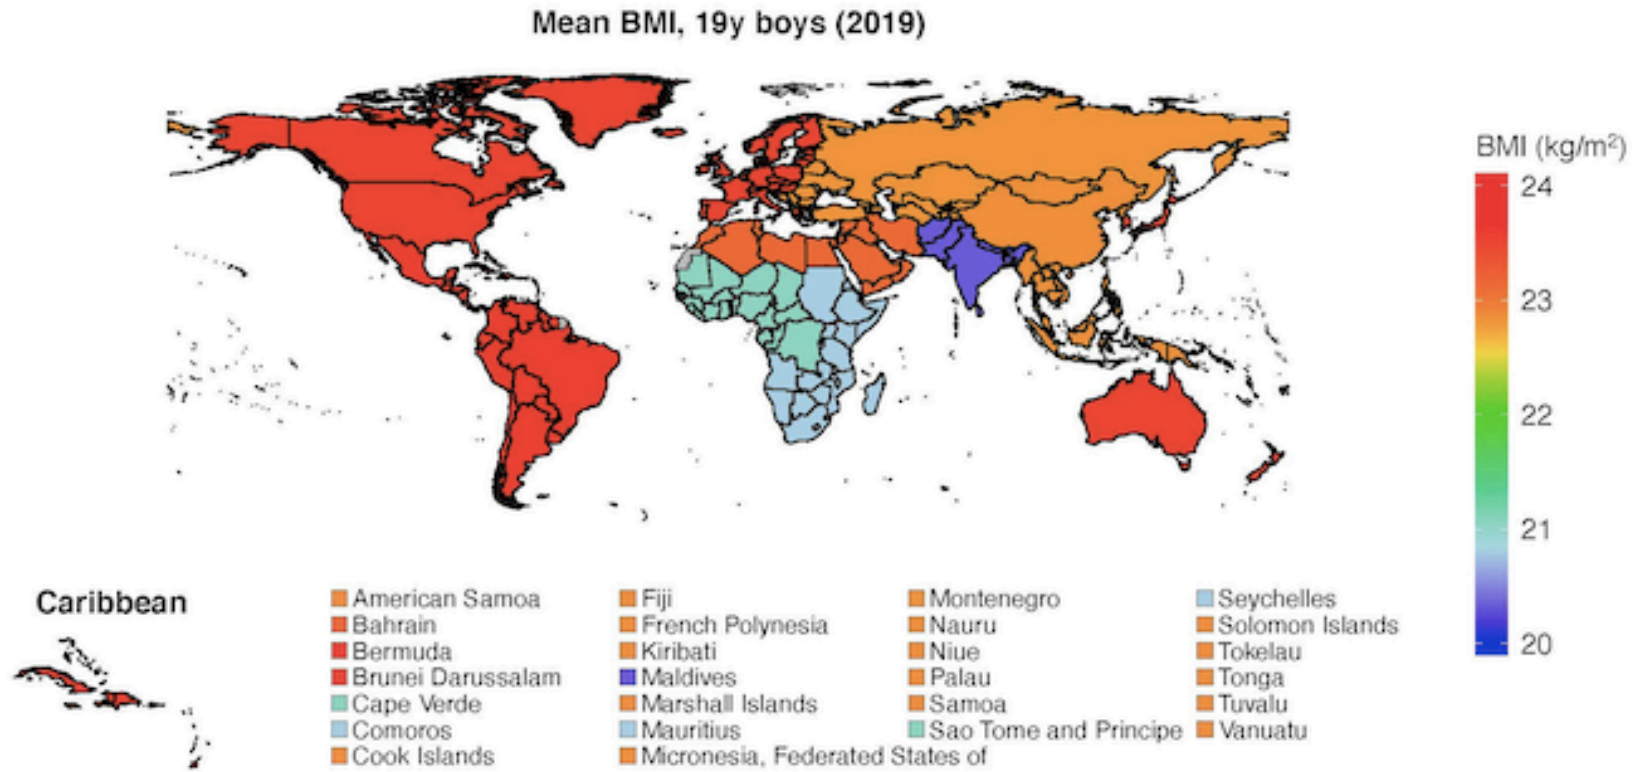

## Appendix Methods A2. Analysis of data from six LMIC cohorts on life-course relationships from birth to adulthood

### Methods

#### *Data*

Data were obtained from six cohorts (Cebu, Delhi, Guatemala, Pelotas 1982, Pelotas 1993, Soweto) including the most recent data collection wave in each. Ethical approval for data collection and analyses was obtained at each site, prior to each wave of data collection. Ethical clearance for the current pooled analyses was granted by the Research Ethics Committee of the School of Medicine, Federal University of Pelotas.

Cohort members were measured at birth, at ~2 years of age (except in the 1993 Pelotas cohort where the age was 1 year), at ~4 years of age (except in Cebu where the age was 8·5 years) and during adulthood. For simplicity, we refer to these visits as follow ups at birth, 2 and 4 years, and adulthood. Cognitive development was measured at different ages in each cohort, ranging from 4·8·5 years. Table A4 provides an overview of the exposure and outcomes variables.

The exposure variables were:

- Length and weight at birth, length-for-age (Z-scores) and BMI-for-age (Z scores) at 2 and 4 years. Birth length was not available for the 1982 Pelotas and Soweto cohorts. For the 2-year measurement, length-for-age was calculated using height (in South Africa) or recumbent length (other sites). These measurements were converted into Z scores with the WHO Growth Standards. ([www.who.int/childgrowth](http://www.who.int/childgrowth))
- Conditional variables: these variables include conditional height and relative weight at 2 years (reflecting growth from birth to 2 years), at 4 years (reflecting growth from 2-4 years), and in adulthood (reflecting growth after 4 y). Conditionals may be interpreted as representing faster (if positive) or slower (if negative) weight gain or linear growth relative to the overall cohort. Conditional height corresponds to the sex-specific standardized residuals from a linear regression of current height-for-age WHO Z scores on all previous height/length and weight measures. Conditional relative weight corresponds to the sex-specific standardized residuals from a linear regression of current weight WHO Z scores on all previous height/length and weight measures, and on concurrent height. For example, conditional height at 4 years is obtained by regressing height-for-age at 4 y on length and weight at birth and at 2 y. Conditional relative weight at 4 y was calculated by regressing weight at 4 y on these same variables, plus height at 4 y. For conditional variables in adulthood, the raw outcome variable was used because the conditionals were generated for each sex separately. Since two cohorts did not measure birth length, only weight at birth was used. The results were virtually identical in sensitivity analyses using birth length for cohorts that measured this variable.
- Development Quotient (DQ) in childhood was measured by the research teams and standardized to Z scores. The Cebu cohort (average age of 8·5 years) were administered the Philippine Nonverbal Intelligence Test (PNIT), modelled on the Raven's Coloured Progressive Matrices. The Guatemala cohort (between 4 and 7 years of age) were administered a Preschool Battery consisting of 22 sub-test tests, drawn from a variety of sources including the Wechsler Preschool and Primary Scale of Intelligence (WPPSI). The 1982 and 1993 Pelotas cohort (4 years of age in both) were administered the Griffiths Scales and the WPPSI, respectively. The Soweto cohort (average age of 5 years) were administered 32 items from the Revised Denver Pre-screening Questionnaire (R-DPDQ)

covering personal-social, fine motor, gross motor, and language abilities. DQ was not measured in the Delhi cohort.

### Overview of the exposure and outcomes variables

| 11 early-life exposures                             | 6 adult outcomes                        |
|-----------------------------------------------------|-----------------------------------------|
| Birth length (WHO Z scores)                         | Attained schooling (years)              |
| Length at 2 years (WHO Z scores)                    | Intelligence (IQ, harmonized units)     |
| Height at 4 years (WHO Z scores)                    | Height (cm)                             |
| Conditional length at 2 years (Z scores)            | Psychiatric problems score (SRQ points) |
| Conditional height at 4 years (Z scores)            | Overweight/obesity (yes/no)             |
| Conditional height in adulthood (Z scores)          | Metabolic syndrome score (0-5 points)   |
| Birth weight (WHO Z scores)                         |                                         |
| BMI at 2 years (WHO Z scores)                       |                                         |
| BMI at 4 years (WHO Z scores)                       |                                         |
| Conditional relative weight at 2 years (Z scores)   |                                         |
| Conditional relative weight at 4 years (Z scores)   |                                         |
| Conditional relative weight in adulthood (Z scores) |                                         |
| Cognitive development at 4-8.5 years (Z scores)     |                                         |

The adult outcomes were:

- Attained schooling: number of years of schooling completed.
- Intelligence (IQ points, standardized to mean=100 and standard deviation=15): Wechsler Adult Intelligence Scale (Pelotas 1982 and 1993 cohorts) and Ravens Scale (Cebu, Guatemala and Soweto). IQ was not measured in the Delhi cohort.
- Height: measured in cm.
- Psychological symptoms: number of symptoms reported in the Self-Reported Questionnaire (SRQ) scale. Not available for the Delhi cohort.
- Overweight/obesity (yes/no): body mass index equal to or above 25 kg/m<sup>2</sup>.
- Metabolic syndrome: number of signs presented by each subject, including: abdominal adiposity (waist circumference  $\geq 102$  cm for males or  $\geq 89$  cm for females), raised blood pressure (systolic blood pressure  $\geq 130$  mmHg or diastolic blood pressure  $\geq 85$  mmHg or taking hypotensive medication), raised triglycerides ( $\geq 150$  mg/dL or taking triglyceride-lowering medication), raised plasma glucose ( $\geq 100$  mg/dL for fasting glucose [all but the Pelotas cohorts] or  $\geq 200$  mg/dL for random glucose or taking diabetes medication) and reduced HDL ( $< 40$  mg/dL for males or  $< 50$  mg/dL for females).

Most outcomes were measured when participants were 34, 35-39, 47-57, 30, 30 and 24 years of age for the Cebu, Delhi, Guatemala, Pelotas 1982, Pelotas 1993 and Soweto cohorts, respectively. For Cebu, triglycerides, HDL and



glucose were measured at 21.5 years of age. For Pelotas 1993, IQ and psychological symptoms were measured at 18 years of age. For Soweto, schooling, IQ and psychological symptoms were measured at 28 years of age.

### Statistical analyses

All statistical analyses were performed using R (<https://www.r-project.org/>). For data description, central tendency (mean and median) and dispersion (minimum, maximum, range and interquartile range) measures were calculated for continuous variables and proportions for categorical variables for each cohort separately.

Association analyses were performed using regression models: linear regression for continuous outcomes and Quasi-Poisson regression for binary (estimating prevalence ratios) and count outcomes (estimating average ratios). To account for the fact that the 1993 Pelotas Birth Cohort collected data in subsamples enriched for low birth weight cases at ages 1 and 4 years, analyses in this cohort involving any variables collected at one or more of these ages (more specifically, length-for-age, BMI-for-age conditional variables and cognitive scores) were weighted using inverse sampling weights.

All association analyses were performed for each cohort and each sex separately. Cohort-specific sex-combined estimates were generated by pooling the corresponding sex-specific results using weighted random effects meta-analysis, where each sex was weighted according to sample size. The cohort-specific results were combined using random effects meta-analysis. Pooled sex-combined estimates were generated by pooling the corresponding pooled sex-specific estimates. The variation between cohorts was estimated using  $I^2$  statistic and Cochran's Q test (in sex-combined analyses, these were calculated based on all cohort- and sex-specific estimates, so that the heterogeneity statistics capture heterogeneity by site and by sex), and random effects meta-regression was used to test for effect modification by sex (calculated based on all cohort and sex-specific estimates rather than pooled sex-specific estimates).

In these analyses, we estimated the association of 11 early-life exposures on 6 adult outcomes. These analyses were classified in two main groups:

- Tracking analyses: associations within the same domain – i.e., association of early-life variables with its respective counterpart in adulthood (e.g., length at birth and adult height). These analyses are summarized in the table below.
- Early determinants analyses: cross-domain associations – i.e., associations of every exposure with every outcome, except for those included in the tracking analyses. These analyses also did not include length and BMI at 2 y and 4 y as exposures.

### Overview of the tracking analyses

| Adult outcome      | Early-life exposure                           |
|--------------------|-----------------------------------------------|
| Height             | Birth length                                  |
|                    | Length at 2 years                             |
|                    | Length at 4 years                             |
|                    | Conditional length at 2 years                 |
|                    | Conditional height at 4 years                 |
| Overweight/obesity | Birth weight                                  |
|                    | BMI at 2 years                                |
|                    | BMI at 4 years                                |
|                    | Conditional relative weight at 2 years        |
|                    | Conditional relative weight at 4 years        |
| IQ                 | Cognitive development quotient at 4-8.5 years |

Tracking analyses quantify how much a given early-life variable predicts its adult counterpart. Since this is an associational (rather than causal) question, these analyses were only adjusted for sex and, for Guatemala, year of birth and intervention group.

Early determinants analyses estimate causal effects. Therefore, a more comprehensive approach was performed to control for confounding. First, these analyses were adjusted for a wider set of covariates. In addition to the covariates included in the tracking analysis, early determinants analyses were adjusted for maternal height (cm), maternal age at birth of the cohort participant (years), maternal schooling (years), paternal schooling (years), child birth order, and early-life socioeconomic quintiles (family income quintiles in Cebu, Delhi and Pelotas (1982 and 1993) cohorts, and wealth quintiles in Guatemala and Soweto cohorts).

In addition to using a wide set of covariates, a doubly robust covariate adjustment strategy was used, where adjustment was performed via multivariable regression after inverse probability of treatment weighting (IPTW). IPTW allows estimating marginal structural models, where the exposure is independent of measured covariates. Since all exposure variables we analyzed are continuous, the weights correspond to  $\frac{f(X)}{f(X|C)}$ , where  $f(X)$  is the probability density function of the continuous exposure  $X$  and  $f(X|C)$  is the conditional probability density function of  $X$  given measured covariates  $C$ . We assumed that the densities  $f(X)$  and  $f(X|C)$  were normal, thus allowing straightforward calculation of the weights using the “ipwpoint” function from the “ipw” package, applying linear regression to model the relationship between the exposure variable and the covariates. This regression was specified to include a “main effect” term for all covariates, as well as all pairwise product terms between covariates. To mitigate the possibility that individuals with large weights could substantially influence the results, the left tail of the weights was truncated at the 0.5<sup>th</sup> percentile, and the right tail at the 99.5<sup>th</sup> percentile.

Weighting the study sample using IPT weights is expected to yield a pseudo-sample where the treatment is independent of measured covariates. However, this is not guaranteed to be the case in practice due to the possibility of model misspecification. To mitigate this possibility, the causal effect of the exposure on the outcome was estimated in the weighted sample using multivariable regression including the same covariates as an additional form of confounding adjustment.

### *Results: Tracking analyses*

The main results of the tracking analyses are shown in Table A6. Forest plots are shown in Figures A32-A34.

There was no strong statistical evidence for effect modification by sex in the pooled tracking analyses ( $P > 0.1$  for all associations). There was strong statistical evidence of positive association for all domains ( $P < 0.0001$  for all pooled tracking analyses). For height and overweight/obesity domains, the magnitude of the association increased with age of the child at the early exposure measurement when unconditional measures of size were examined. For height, point estimates ranged from 1.68 (95% CI: 1.52; 1.84) to 4.40 cm (95% CI: 4.21; 4.60) per Z score increment in length at birth and height at 4 years, respectively. For overweight/obesity, the estimates ranged from 1.07 (95% CI: 1.05; 1.09) to 1.28 (95% CI: 1.21; 1.36) times higher per Z score increment in birth weight and BMI at 4 years, respectively. For intelligence, the only early-life measure available was at 4-8.5 years. The estimate was 7.30 (95% CI: 5.85; 8.76) points per Z score increment in cognitive development scores.

In the case of conditional exposures, the association with adult height was stronger for conditional height at 2 years than at 4 years: 3.35 (95% CI: 3.06; 3.63) vs. 2.30 (95% CI: 2.03; 2.58), respectively. This suggests that linear growth from birth to 2 years is more strongly associated with adult height than growth from 2 years to 4 years. For adult overweight/obesity, the association with conditional variables was similar for both ages (if not slightly stronger at 4 years).

The  $I^2$  statistic (Table A6) shows that there was substantial heterogeneity ( $P < 0.05$ ) among cohorts in all associations, except for the association between birth weight and adult overweight/obesity.  $I^2$  values must be interpreted with caution as they are influenced by sample sizes (which are very large in our analyses) and also because what really matters is whether the effects observed in all cohorts were in the same direction and of similar magnitudes.

**Appendix Table A6. Main results of the tracking analyses. See next pages for the forest plots**

<sup>A</sup> Estimates correspond to a Z score increment in the exposure

| Adult outcome               | Early-life exposure                    | Effect measure | # sites | Pooled sample size | Pooled effect      |                                  |         | Interaction with sex (P-value) |
|-----------------------------|----------------------------------------|----------------|---------|--------------------|--------------------|----------------------------------|---------|--------------------------------|
|                             |                                        |                |         |                    | I <sup>2</sup> (%) | Beta or PR (95% CI) <sup>A</sup> | P-value |                                |
| Height (cm)                 | Birth length                           | Beta           | 4       | 7565               | 28.5               | 1.68 (1.52; 1.84)                | <0.0001 | 0.437                          |
|                             | Length at 2 years                      | Beta           | 6       | 10359              | 30.4               | 3.27 (3.15; 3.39)                | <0.0001 | 0.360                          |
|                             | Height at 4 years                      | Beta           | 6       | 10429              | 76.4               | 4.40 (4.21; 4.60)                | <0.0001 | 0.351                          |
|                             | Conditional length at 2 years          | Beta           | 6       | 9148               | 58.1               | 3.34 (3.06; 3.63)                | <0.0001 | 0.101                          |
|                             | Conditional height at 4 years          | Beta           | 6       | 9148               | 74.0               | 2.30 (2.03; 2.58)                | <0.0001 | 0.337                          |
| Overweight/obesity (yes/no) | Birth weight                           | PR             | 6       | 11316              | 0.0                | 1.07 (1.05; 1.09)                | <0.0001 | 0.524                          |
|                             | BMI at 2 years                         | PR             | 6       | 8129               | 62.6               | 1.16 (1.12; 1.19)                | <0.0001 | 0.569                          |
|                             | BMI at 4 years                         | PR             | 6       | 8136               | 88.6               | 1.28 (1.21; 1.36)                | <0.0001 | 0.986                          |
|                             | Conditional relative weight at 2 years | PR             | 6       | 7210               | 49.7               | 1.15 (1.12; 1.18)                | <0.0001 | 0.618                          |
|                             | Conditional relative weight at 4 years | PR             | 6       | 7210               | 88.6               | 1.19 (1.12; 1.25)                | <0.0001 | 0.920                          |
| IQ (points)                 | Cognitive development at 4 years       | Beta           | 5       | 3646               | 88.9               | 7.30 (5.85; 8.76)                | <0.0001 | 0.880                          |

Beta: linear regression coefficient. BMI: body mass index. PR: prevalence ratio. CI: confidence interval. IQ: intelligence quotient, standardized to have mean=100 and standard deviation=15 within each cohort.

**Appendix Figure A31. Forest plots of the height tracking analyses. The estimates can be interpreted as changes in adult height (in cm) per Z score increment length/height at 2 (2y) and 4 (4y) years of age**

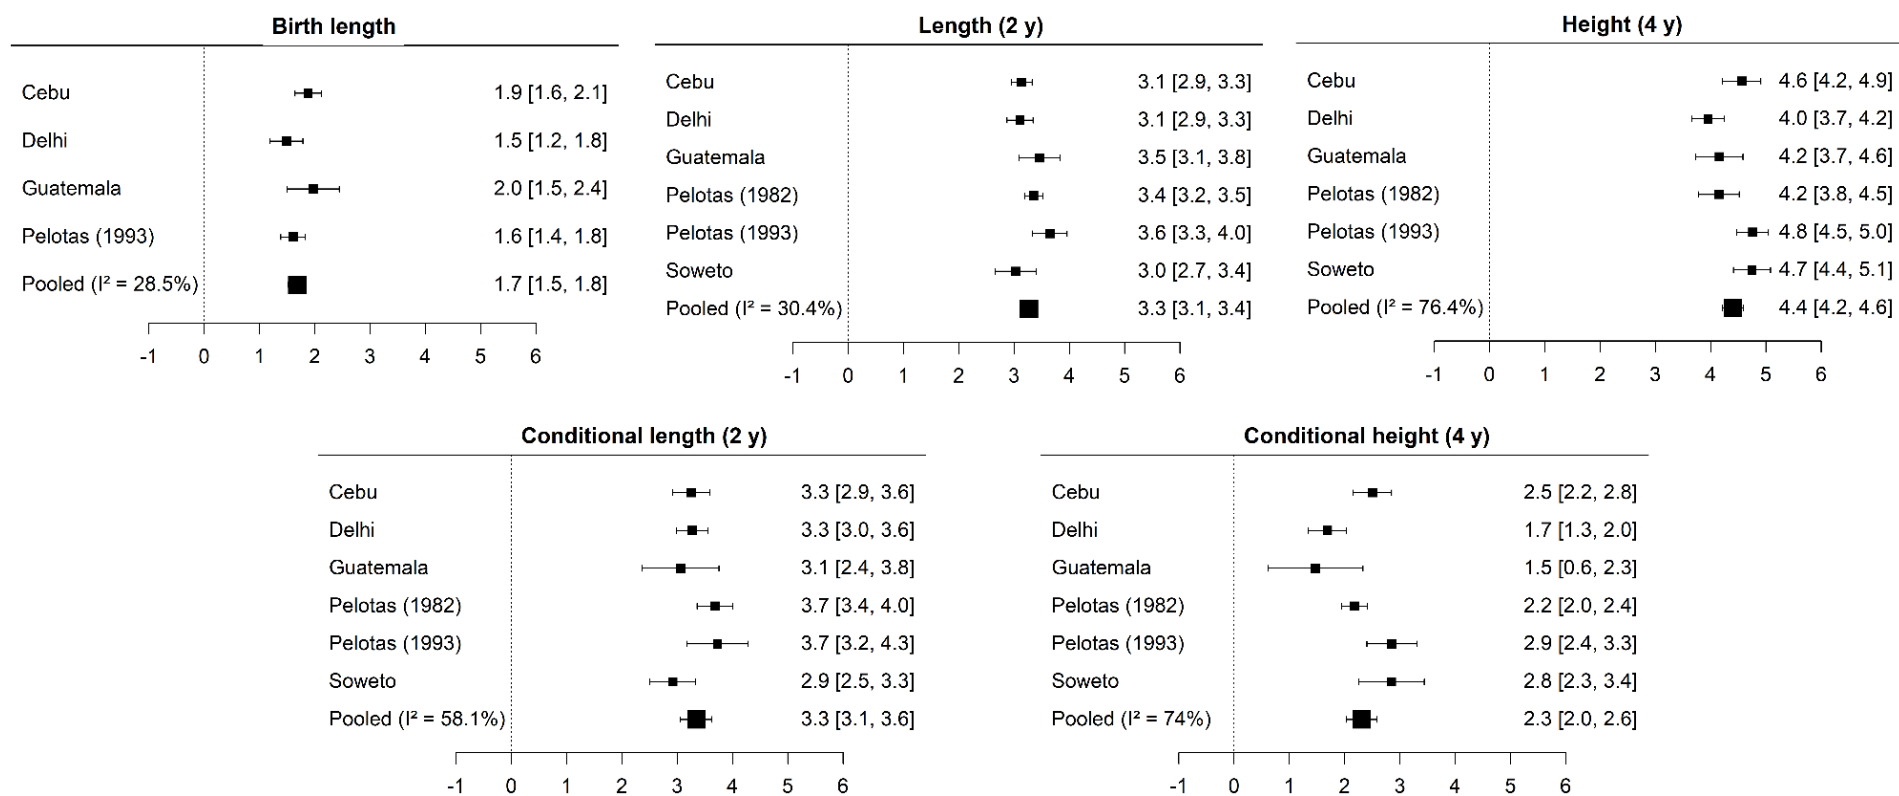

**Appendix Figure A32. Forest plots of the overweight/obesity tracking analyses. The estimates can be interpreted as prevalence ratios of overweight/obesity in adulthood per Z score increment in weight or body mass index (BMI) at 2 (2y) and 4 (4y) years of age**

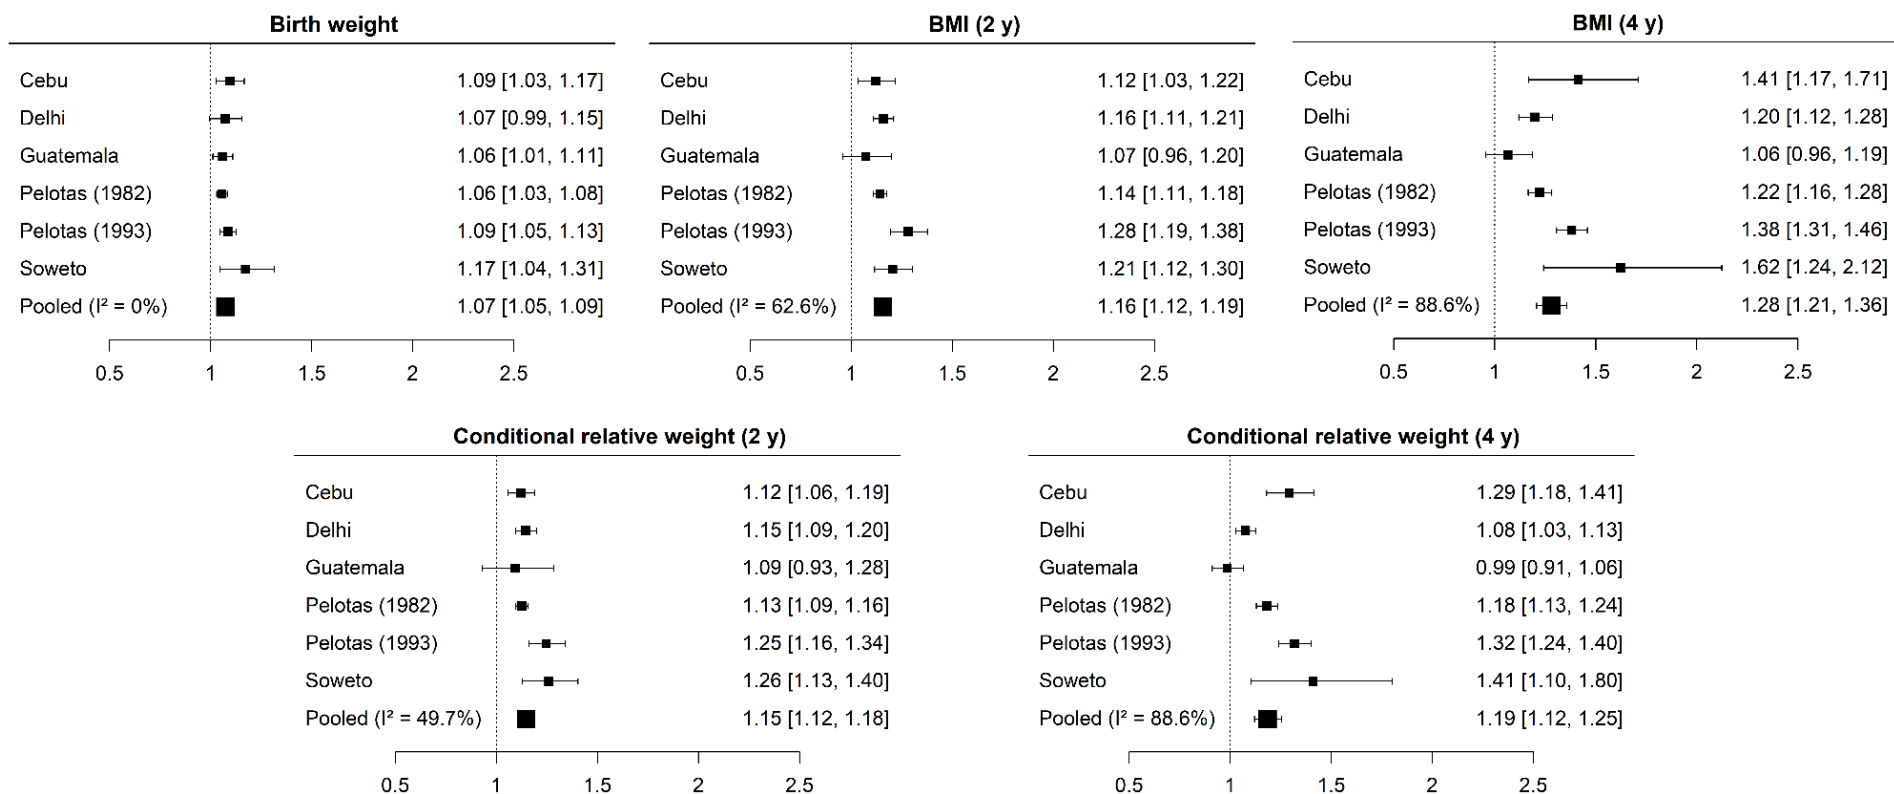

**Appendix Figure A33. Forest plot of the intelligence tracking analyses. The estimates can be interpreted as changes in adult IQ (in standardized units so that mean=100 and standard deviation=15) per Z score increment in cognitive development at 4-8.5 years of age**

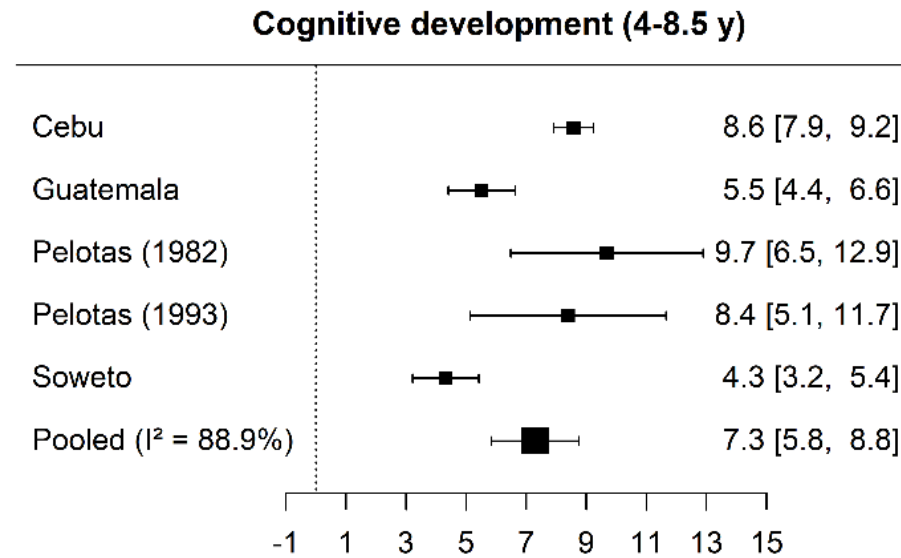

## Appendix Panel A1. The Young Lives Study

Young Lives (YL) is a prospective longitudinal study of childhood poverty in four differing LMICs and world regions: Ethiopia, India, Peru, and Vietnam. YL samples provide broad representation of all but highest-income families. YL aims to illuminate child poverty drivers and impacts, and thereby enhance program/policy design. Younger cohorts of ~8,000 6-18 months old children born in 2001-02 and older cohorts of ~4,000 eight-year olds born in 1994-95 have been followed in five survey rounds since 2002 designed to permit comparisons of the same children at different ages and different children at the same age. The simultaneous four-country study with comparable survey instruments enables YL to report on trends and explore cross-country similarities and differences. The YL public-access data have been used in hundreds of analyses. Some salient results based on YL data for this paper's themes are:

*Nutritional status during childhood and adolescence:* Nutritional status at 1 year of age (height-for-age z-score, HAZ) significantly predicted HAZ at 5 and 8 years, and nutritional status changes from 1 to 5 years were also predictive of HAZ at age 8 years.<sup>1-5</sup> Analysis of subgroups of children for each country-cohort revealed trajectories showing increases in HAZ for some study children between 12y and adulthood in the older cohort in Ethiopia (20.1% of the cohort), India (20.5%), Peru (16.9%), and Vietnam (14.0%). On the other hand, there were subgroups having increasing probabilities of stunting (HAZ < -2) as children aged from 12y to adulthood in the older cohort in India (22.2%) and Peru (30.7%). Comparing the older and younger cohorts, there were increases in overweight prevalence at 8y in Vietnam (1.2 to 8.1%) and Peru (15.6 to 18.5%), but not in the other countries, and increases in adolescent (age 15y) overweight prevalence in India (3.5 to 5.7%), Peru (18.5 to 22.5%) and Vietnam (3.3 to 7.8%), but not in Ethiopia.<sup>6</sup> The findings of these studies, though variable among countries, suggest that critical nutritional investments are important in the first 1,000 days but also that there are opportunities at later ages for the prevention of stunting and overweight.

*Cognitive skills and prior nutritional status, household characteristics and policies:* HAZ of one-year-old girls and boys significantly predicted cognitive achievement at 5, 8 and 15 years in all four countries. Increases in HAZ up to 15 years were associated with increases in cognitive function that varied by sex, being stronger for boys in India and Peru, and for girls in Vietnam, with no sex difference in Ethiopia.<sup>1-3</sup> Unfortunately, there are no measurements at birth nor at the critical age of two years. In the Peru sample, formal preschool attendance predicted better language performance, more so for children with better infant nutritional status.<sup>7</sup> Across the four countries, school enrollment and time spent in educational activities were more strongly associated with adolescent cognitive performance than were HAZ at 1 year and change in HAZ from 1 to 15 years.<sup>3</sup> These studies suggest that early-life nutritional deprivation has adverse effects on learning, but also that there can be beneficial effects of nutritional gains and of learning opportunities later in childhood. Thus, consistent with NC, investments in health, nutrition and education are necessary throughout childhood and adolescence to enhance human capital.

### References

1. Georgiadis A, Benny L, Crookston BT, et al. Growth trajectories from conception through middle childhood and cognitive achievement at age 8 years: Evidence from four low- and middle-income countries. *SSM Popul Health* 2016; **2**: 43-54.
2. Crookston BT, Schott W, Cueto S, et al. Postinfancy growth, schooling, and cognitive achievement: Young Lives. *Am J Clin Nutr* 2013; **98**(6): 1555-63.
3. Aurino E, Schott W, Behrman JR, Penny M. Nutritional Status from 1 to 15 Years and Adolescent Learning for Boys and Girls in Ethiopia, India, Peru, and Vietnam. *Population Research and Policy Review* 2019; **38**(6): 899-931.
4. Lundeen EA, Behrman JR, Crookston BT, et al. Growth faltering and recovery in children aged 1-8 years in four low- and middle-income countries: Young Lives. *Public Health Nutr* 2014; **17**(9): 2131-7.
5. Duc LT, Behrman JR. Heterogeneity in predictive power of early childhood nutritional indicators for mid-childhood outcomes: Evidence from Vietnam. *Econ Hum Biol* 2017; **26**: 86-95.
6. Schott W, Aurino E, Penny ME, Behrman JR. The double burden of malnutrition among youth: Trajectories and inequalities in four emerging economies. *Econ Hum Biol* 2019; **34**: 80-91.
7. Cueto S, León J, Miranda A, Dearden K, Crookston BT, Behrman JR. Does pre-school improve cognitive abilities among children with early-life stunting? A longitudinal study for Peru. *International journal of educational research* 2016; **75**: 102-14.

## Appendix Panel A2. The Dunedin Multidisciplinary Health and Development Study

The Dunedin Study is an ongoing longitudinal investigation of the health and behavior of a birth cohort that was drawn from the greater Dunedin metropolitan area, located in the southern coastal region of New Zealand's South Island. Study participants (n=1037) were born between April 1st, 1972 and March 30th, 1973, and first followed up at age three, forming the base sample for the longitudinal study. The cohort represents the full range of socioeconomic status on New Zealand's South Island and matches the New Zealand National Health and Nutrition Survey on several key health indicators, including BMI, smoking, and general practitioner visits.<sup>1</sup> The cohort is primarily white; fewer than 7% self-identify as having non-Caucasian ancestry. Assessments were carried out at birth and ages 3, 5, 7, 9, 11, 13, 15, 18, 21, 26, 32, 38, and, in 2019, age 45 years, when 938 of 997 (94.1%) survivors participated.<sup>2</sup>

*Health outcomes:* Childhood cognitive ability, self-control, and socioeconomic advantage in the first decade of life predicted cardiovascular health at 38 years.<sup>3</sup> Higher BMI at 3 years was associated with increased risk of endothelial dysfunction (a predictor of cardiovascular disease and all-cause mortality) at age 38.<sup>4</sup> Higher childhood IQ at ages 7-13 predicted better adult cardiorespiratory fitness at age 38.<sup>5</sup> Children who were socially isolated between 5-11 years were at significantly higher risk of poor health in young adulthood compared with non-isolated children (RR 1.37, 95% CI 1.17-1.61).<sup>6</sup> Maltreatment in the first decade of life was related to increases in low-grade inflammation at 32 years, as measured by clinically relevant C-reactive protein levels (RR 1.80, 95% CI 1.26-2.58).

*Cognition, educational attainment, and socio-economic outcomes:* Early self-control (ages 3-11 years) appeared as an important predictor of educational attainment, as children with lower self-control tended to leave school early with no educational qualifications.<sup>7</sup> Lack of high school qualification, family conflict, low IQ and difficult temperament, including poor self-control in the first decade of life, were associated with later unemployment<sup>8</sup> and dependency on social welfare.<sup>9</sup>

*Social relationships and mental health outcomes:* Poor self-control in the first decade of life was associated with early smoking,<sup>7</sup> adult conduct problems, criminal convictions,<sup>9</sup> and disordered gambling.<sup>10</sup> Children assessed as being 'undercontrolled' at age 3 grew up to be more impulsive, unreliable, and antisocial.<sup>11</sup> Conduct disorder assessed at age 11 was associated with socioeconomic disadvantage and behavior problems in adulthood, such as intimate partner violence.<sup>12</sup> Being the victim of maltreatment in the first decade of life was also associated with having more criminal convictions at age 38.<sup>9</sup> Children exposed to adverse psychosocial experiences, including socioeconomic disadvantage, maltreatment or social isolation in the first decade of life were at higher risk of developing depression.<sup>13</sup> Lower childhood IQ at 7-11 years was associated with a higher risk of developing schizophrenia spectrum disorder, depression, and anxiety in adulthood.<sup>14</sup> Children who exhibited developmental impairment in the first decade of life were more likely to develop psychotic symptoms at 11 years and schizophrenia as adults.<sup>15</sup> There is also evidence suggesting social connectedness in adolescence represents a pathway indirectly linking adolescent academic achievement and adult well-being at 32 years (as measured by positive coping styles, social participation, and prosocial behaviour).<sup>16</sup>

### References

1. Poulton R, Moffitt TE, Silva PA. The Dunedin Multidisciplinary Health and Development Study: overview of the first 40 years, with an eye to the future. *Soc Psychiatry Psychiatr Epidemiol* 2015; **50**(5): 679-93.
2. Rasmussen LJH, Caspi A, Ambler A, et al. Association of Neurocognitive and Physical Function With Gait Speed in Midlife. *JAMA Netw Open* 2019; **2**(10): e1913123.
3. Melchior M, Moffitt TE, Milne BJ, Poulton R, Caspi A. Why do children from socioeconomically disadvantaged families suffer from poor health when they reach adulthood? A life-course study. *American journal of epidemiology* 2007; **166**(8): 966-74.
4. Williams MJA, Milne BJ, Ambler A, et al. Childhood body mass index and endothelial dysfunction evaluated by peripheral arterial tonometry in early midlife. *Int J Obes (Lond)* 2017; **41**(9): 1355-60.
5. Belsky DW, Moffitt TE, Corcoran DL, et al. The Genetics of Success: How Single-Nucleotide Polymorphisms Associated With Educational Attainment Relate to Life-Course Development. *Psychol Sci* 2016; **27**(7): 957-72.
6. Caspi A, Harrington H, Moffitt TE, Milne BJ, Poulton R. Socially isolated children 20 years later: risk of cardiovascular disease. *Arch Pediatr Adolesc Med* 2006; **160**(8): 805-11.
7. Moffitt TE, Arseneault L, Belsky D, et al. A gradient of childhood self-control predicts health, wealth, and public safety. *Proc Natl Acad Sci U S A* 2011; **108**(7): 2693-8.



8. Caspi A, Wright BRE, Moffitt TE, Silva PA. Early failure in the labor market: Childhood and adolescent predictors of unemployment in the transition to adulthood. *American sociological review* 1998; 424-51.
9. Caspi A, Houts RM, Belsky DW, et al. Childhood forecasting of a small segment of the population with large economic burden. *Nat Hum Behav* 2016; **1**.
10. Slutske WS, Moffitt TE, Poulton R, Caspi A. Undercontrolled temperament at age 3 predicts disordered gambling at age 32: a longitudinal study of a complete birth cohort. *Psychological science* 2012; **23**(5): 510-6.
11. Caspi A. The child is father of the man: personality continuities from childhood to adulthood. *Journal of personality and social psychology* 2000; **78**(1): 158.
12. Jaffee SR, Belsky J, Harrington H, Caspi A, Moffitt TE. When parents have a history of conduct disorder: How is the caregiving environment affected? *Journal of abnormal psychology* 2006; **115**(2): 309.
13. Danese A, Moffitt TE, Harrington H, et al. Adverse childhood experiences and adult risk factors for age-related disease: depression, inflammation, and clustering of metabolic risk markers. *Arch Pediatr Adolesc Med* 2009; **163**(12): 1135-43.
14. Koenen KC, Moffitt TE, Roberts AL, et al. Childhood IQ and adult mental disorders: a test of the cognitive reserve hypothesis. *Am J Psychiatry* 2009; **166**(1): 50-7.
15. Cannon M, Caspi A, Moffitt TE, et al. Evidence for early-childhood, pan-developmental impairment specific to schizophreniform disorder: results from a longitudinal birth cohort. *Arch Gen Psychiatry* 2002; **59**(5): 449-56.
16. Olsson CA, McGee R, Nada-Raja S, Williams SM. A 32-year longitudinal study of child and adolescent pathways to well-being in adulthood. *Journal of Happiness Studies* 2013; **14**(3): 1069-83.

## References

1. Black MM, Behrman JR, Daelmans B, et al. The principles of Nurturing Care promote human capital and mitigate adversities from preconception through adolescence. *BMJ Global Health* 2021; **6**(4): e004436.
2. United Nations Inter-agency Group for Child Mortality Estimation (UN IGME). A Neglected Tragedy: the Global Burden of Stillbirths: Report of the Un Inter-Agency Group for Child Mortality Estimation 2020. New York: United Nations Children's Fund, The UNICEF; 2020.
3. United Nations. Inter-agency Group for Child Mortality Estimation (UN IGME). Levels and Trends in Child Mortality: Report 2020: Estimates developed by the United Nations Inter-agency Group for Child Mortality Estimation. New York, 2020.
4. Masquelier B, Hug L, Sharrow D, et al. Global, regional, and national mortality trends in youth aged 15-24 years between 1990 and 2019: a systematic analysis. *Lancet Glob Health* 2021; **9**(4): e409-e17.
5. Burke M, Heft-Neal S, Bendavid E. Sources of variation in under-5 mortality across sub-Saharan Africa: a spatial analysis. *Lancet Glob Health* 2016; **4**(12): e936-e45.
6. Mulick AR, Oza S, Prieto-Merino D, Villavicencio F, Cousens S, Perin J. A Bayesian hierarchical model with integrated covariate selection and misclassification matrices to estimate neonatal and child causes of death. *medRxiv* 2021: 2021.02.10.21251488.
7. Perin, J Mulick A, Yeung D, et al. Global, regional, and national causes of under-5 mortality in 2000-19: an updated systematic analysis with implications for the Sustainable Development Goals. *Lancet Child Adolesc Health* 2022; **6**(2):106-115.
8. Liu L, Villavicencio F, Yeung D, et al. National, regional, and global causes of 5-19 year olds from 2000 to 2019: a systematic analysis (in press). *Lancet Glob Health*.
9. Blencowe H, Krusevec J, de Onis M, et al. National, regional, and worldwide estimates of low birthweight in 2015, with trends from 2000: a systematic analysis. *Lancet Glob Health* 2019; **7**(7): e849-e60.
10. Corsi DJ, Neuman M, Finlay JE, Subramanian SV. Demographic and health surveys: a profile. *Int J Epidemiol* 2012; **41**(6): 1602-13.
11. Hancioglu A, Arnold F. Measuring coverage in MNCH: tracking progress in health for women and children using DHS and MICS household surveys. *PLoS medicine* 2013; **10**(5): e1001391-e.
12. UNICEF (United Nations Children's Fund). MICS Manual for Anthropometry. New York: UNICEF; 2017.
13. USAID (U.S. Agency for International Development). Biomarker Field Manual, Demographic and Health Surveys Methodology. Calverton, Maryland: USAID 2012.
14. WHO (World Health Organization). WHO child growth standards: length/height for age, weight-for-age, weight-for-length, weight-for-height and body mass index-for-age, methods and development. Geneva: WHO; 2006.
15. Fan J, Gijbels I. Local Polynomial Modelling and Its Applications. London: Chapman & Hall; 1996. <https://doi.org/10.1201/9780203748725>
